# 1 Exotic alleles of *EARLY FLOWERING 3* 2 determine plant development and grain yield in 3 barley

---

4 Tanja Zahn<sup>1</sup>, Zihao Zhu<sup>2</sup>, Niklas Ritoff<sup>1</sup>, Jonathan Krapf<sup>1</sup>, Astrid Junker<sup>3</sup>, Thomas Altmann<sup>3</sup>,  
5 Thomas Schmutzer<sup>1</sup>, Christian Tüting<sup>4</sup>, Panagiotis L. Kastiris<sup>4,5,6</sup>, Marcel Quint<sup>2,7</sup>, Klaus  
6 Pillen<sup>1</sup>, Andreas Maurer<sup>1\*</sup>

7 <sup>1</sup> Institute of Agricultural and Nutritional Sciences, Chair of Plant Breeding, Martin Luther University Halle-Wittenberg,  
8 Betty-Heimann-Str. 3, 06120, Halle (Saale), Germany, <sup>2</sup> Institute of Agricultural and Nutritional Sciences, Martin Luther  
9 University Halle-Wittenberg, Betty-Heimann-Str. 5, 06120, Halle (Saale), Germany, <sup>3</sup> Department of Molecular Genetics,  
10 Leibniz Institute of Plant Genetics and Crop Plant Research (IPK) Gatersleben, Stadt Seeland, Germany, <sup>4</sup> Interdisciplinary  
11 Research Center HALOmem, Charles Tanford Protein Center, Martin Luther University Halle-Wittenberg, Kurt-Mothes-Str.  
12 3a, 06120, Halle (Saale), Germany, <sup>5</sup> Institute of Biochemistry and Biotechnology, Martin Luther University Halle-  
13 Wittenberg, Kurt-Mothes-Str. 3, 06120, Halle (Saale), Germany, <sup>6</sup> Biozentrum, Martin Luther University Halle-Wittenberg,  
14 Weinbergweg 22, 06120, Halle (Saale), Germany, <sup>7</sup> German Centre for Integrative Biodiversity Research(iDiv), Halle-Jena-  
15 Leipzig, Germany

16

17 \* andreas.maurer@landw.uni-halle.de

18

## 19 **Abstract**

20 Adaptation of crops to an increasing range of environmental conditions will be substantial for  
21 future plant breeding. *EARLY FLOWERING 3 (ELF3)* is an important regulator of various  
22 physiological and developmental processes and hence may serve to improve plant adaptation.  
23 To expand the limited knowledge on barley *ELF3* in determining yield formation, we  
24 conducted field studies with heterogeneous inbred families (HIFs) derived from selected lines  
25 of the wild barley nested association mapping population HEB-25. During two growing  
26 seasons, phenotypes of nearly isogenic HIF sister lines, segregating for exotic and cultivated  
27 alleles at the *ELF3* locus, were compared for ten developmental and yield-related traits. We  
28 show that HIF lines, carrying the exotic *ELF3* allele, accelerated plant development and were  
29 able to increase yield-related traits compared to the cultivated *ELF3* allele. Furthermore, the  
30 *ELF3* coding sequences were used to determine *ELF3* proteoforms, where a single amino acid  
31 substitution likely leads to an altered protein structure of *ELF3*, thereby directly affecting  
32 phase separation behaviour and nano-compartment formation of *ELF3*. Possibly, the effect of  
33 this substitution is also affecting the disorder-driven phase separation events within the  
34 cellular community of *ELF3*, and, ultimately, regulates a functional complex, thus causing  
35 significant trait differences between HIF sister lines.

## 36 Introduction

37 Performance of crops like barley depends on their ability to adapt to different environments,  
38 which ultimately determines yield stability. In context of an ever growing world population  
39 and climate change, maximizing crop yields for further food supply will be pivotal  
40 (FAOSTAT, 2009) and could be ensured, for example, by adaptation of crops to different  
41 environments (Challinor *et al.*, 2014). More precisely, a meta-analysis of crop yield under  
42 climate change and adaptation based on 1,700 studies even predicted that cultivar adaptation  
43 would be the most promising way to increase yield under the predicted climate change  
44 (Challinor *et al.*, 2014). For a maximization of grain yield by adaptation, the exact timing of  
45 plant development and flowering time are particularly important (Cockram *et al.*, 2007;  
46 Wiegmann *et al.*, 2019).

47 Flowering time is mainly controlled by day length and vernalisation (Andres and Coupland,  
48 2012; Turner *et al.*, 2005). To adjust flowering time, plants therefore need to be able to react  
49 to changes in photoperiod and temperature. For adaptation of barley cultivation to a wider  
50 range of environments, early flowering genotypes are necessary for short-growing seasons,  
51 while late flowering increases yield in temperate climates (Cockram *et al.*, 2007; Fernandez-  
52 Calleja *et al.*, 2021). The response to photoperiod under long day conditions in barley is  
53 mainly controlled by *PPD-H1*, a pseudo-response regulator, which promotes *VRN-H3*, a  
54 homologue of the *Arabidopsis thaliana* (*Arabidopsis*) *FLOWERING LOCUS T (FT)*, through  
55 *CONSTANS (CO)*, but also independently of *CO*, leading to the induction of flowering  
56 (Campoli *et al.*, 2012a; Faure *et al.*, 2012; Turner *et al.*, 2005; Yan *et al.*, 2006). Vernalisation  
57 requirement is mainly controlled by the interaction of *VRN-H1* (Yan *et al.*, 2003), and *VRN-*  
58 *H2* (Yan *et al.*, 2004), both affecting *VRN-H3*. While *VRN-H2* represses *VRN-H3*, *VRN-H1* is  
59 upregulated during vernalisation, leading to the activation of *VRN-H3* and repression of *VRN-*  
60 *H2* which in turn leads to the interruption of *VRN-H2* regulated *VRN-H3* repression,  
61 promoting the induction of flowering (Deng *et al.*, 2015; Hemming *et al.*, 2008; Yan *et al.*,  
62 2006). Due to a natural deletion of the entire *VRN-H2* gene, spring barley lacks the  
63 vernalisation requirement (Hemming *et al.*, 2008; von Zitzewitz *et al.*, 2005; Yan *et al.*,  
64 2004). Furthermore, there are genotypes that do not respond to photoperiod or vernalisation,  
65 making it possible to expand crop cultivation even further north. These genotypes have been  
66 characterized with *early maturity (eam)* or *earliness per se (eps)* loci (Faure *et al.*, 2012).  
67 These loci may bring a new source of variation for the adaptation to different environments  
68 (Campoli and von Korff, 2014).

69 Flowering time is a complex trait which is controlled by a large regulatory network (Blümel  
70 *et al.*, 2015). A central role in this network is taken by *EARLY FLOWERING 3 (ELF3)*, which  
71 is the focus of this study. ELF3 is an integral part of the circadian clock in both Arabidopsis  
72 and barley (Faure *et al.*, 2012; Zagotta *et al.*, 1996; Zakhrebekova *et al.*, 2012). In general, the  
73 circadian clock is necessary to react and adapt to daily and seasonal environmental changes  
74 (Harmer, 2009; Wijnen and Young, 2006). It regulates a number of important genes that  
75 control plant growth processes and thereby contributes significantly to plant performance of  
76 important agronomic traits and adaptation to different environments (Bendix *et al.*, 2015;  
77 Calixto *et al.*, 2015; Nusinow *et al.*, 2011).

78 The mechanistic understanding of the circadian clock is mainly based on studies in the model  
79 plant Arabidopsis, where *ELF3* functions as a core component of the clock (Nusinow *et al.*,  
80 2011; Thines and Harmon, 2010). Arabidopsis *ELF3 (AtELF3)* is an oscillating gene with an  
81 expression peak in the early evening. *AtELF3* encodes a multifunctional protein that in turn  
82 regulates various physiological and developmental processes (Hicks *et al.*, 2001; Nusinow *et*  
83 *al.*, 2011), for example by repressing the activity of further core circadian clock genes (Dixon  
84 *et al.*, 2011). Due to its diverse protein-protein interaction networking capabilities, *AtELF3*  
85 presumably functions as a hub (Huang *et al.*, 2016). Together with ELF4 and LUX  
86 ARRHYTHMO (LUX), *AtELF3* forms the evening complex (EC), a transcriptional regulator,  
87 which is an integral part of the circadian clock, repressing clock and growth-associated  
88 transcription factors (Huang and Nusinow, 2016; Nusinow *et al.*, 2011). For loss-of-function  
89 *AtELF3* mutants an early flowering phenotype was shown (Zagotta *et al.*, 1996) and in the  
90 context of this analysis it is important to note that *AtELF3* controls photoperiod-responsive  
91 growth and flowering time, as well as temperature responsiveness of the circadian clock  
92 (Anwer *et al.*, 2020; Jung *et al.*, 2020; Zhu *et al.*, 2021).

93

94 In barley (*Hordeum vulgare*), several clock orthologues from Arabidopsis have been  
95 identified with a high degree of conservation (Calixto *et al.*, 2015; Campoli *et al.*, 2012b;  
96 Müller *et al.*, 2020). The gene *Praematurum-a (Mat-a)/EARLY MATURITY 8 (EAM8)* was  
97 identified as a barley homologue of *AtELF3* (Faure *et al.*, 2012; Zakhrebekova *et al.*, 2012),  
98 from then on denoted as *HvELF3*. Its influence on flowering seems conserved since barley  
99 plants with a loss-of-function *elf3* also show early flowering phenotypes. Furthermore, those  
100 plants are insensitive to photoperiod and their circadian rhythm is disrupted (Boden *et al.*,  
101 2014; Faure *et al.*, 2012; Zakhrebekova *et al.*, 2012). Also, *HvELF3* has recently been  
102 identified as a core component of the circadian oscillator since its absence leads to a non-

103 rhythmic expression of other clock components (Müller *et al.*, 2020), making it an essential  
104 regulator of the clock also in barley. Faure *et al.* (2012) have shown that *elf3* mutations lead  
105 to a higher expression of *PPD-H1*, particularly during the night, which subsequently induces  
106 *VRN-H3* and thereby earlier flowering. Also, under long day conditions, variation at *PPD-H1*  
107 was shown to influence flowering time of *elf3* mutants (Faure *et al.*, 2012). Furthermore, in  
108 *elf3* mutants, altered expression of core clock and clock-output genes (*CONSTANS*, *VRN-H3*,  
109 *CIRCADIAN CLOCK ASSOCIATED1*, *GIGANTEA*, *TIMING OF CAB EXPRESSION1*) has  
110 been observed and increased expression of *HvFT1* (*VRN-H3*) was observed independently of  
111 *PPD-H1* (Boden *et al.*, 2014; Faure *et al.*, 2012). Ejaz and von Korff (2017) have shown later  
112 flowering under high ambient temperature for the cultivar Bowman, which harbours a  
113 functional *HvELF3* allele, whereas, for an introgression line with a non-functional *HvELF3*  
114 allele in a Bowman background, flowering time was accelerated. Furthermore, a larger  
115 reduction in floret and seed number has been observed for Bowman under high ambient  
116 temperature than for the introgression line. As such, *ELF3* (or natural variants/mutants  
117 thereof) contributed significantly to barley domestication and adaptation to higher latitudes by  
118 conferring a day-neutral flowering phenotype.

119 All barley research mentioned above is based on *elf3* loss-of-function mutants. We wanted to  
120 explore the role of natural barley *ELF3* variants, which is why we used the nested association  
121 mapping (NAM) population “Halle Exotic Barley” (HEB-25). The population originates from  
122 crosses of 25 highly divergent wild barley accessions (*Hordeum vulgare* ssp. *spontaneum* and  
123 *agriocrithon*, hereafter abbreviated as *Hsp*) with the elite cultivar Barke (*Hordeum vulgare*  
124 ssp. *vulgare*, hereafter abbreviated as *Hv*). The basis of our study were the results from a  
125 previous study on plant development traits in barley, where we identified a QTL region  
126 containing the *ELF3* locus (Maurer *et al.*, 2016). This QTL significantly affected the traits  
127 shooting (SHO), shoot elongation phase (SEL), heading (HEA), maturity (MAT) and plant  
128 height (HEI). Herzig *et al.* (2018) also describe the potential effects of *ELF3* on the traits  
129 SHO, HEA, MAT and HEI, confirming the results from the previous study in a different  
130 environmental context. In both studies the exotic *ELF3* alleles (*ELF3<sub>Hsp</sub>*) accelerated plant  
131 development and decreased plant height compared to the cultivated *ELF3* allele (*ELF3<sub>Hv</sub>*).  
132 Furthermore, *ELF3<sub>Hsp</sub>* effects for the mentioned traits varied for the 25 HEB families. Results  
133 for QTL1H10 (128-133.1 cM), the respective QTL for *ELF3*, were extracted from Herzig *et al.*  
134 (2018) and are shown in Fig. 1 for the trait HEA. Here, the exotic *ELF3<sub>Hsp</sub>* has varying  
135 effects among HEB families, but it is, in most cases, accelerating flowering (up to 2 days)  
136 compared to the cultivated barley *ELF3<sub>Hv</sub>* allele. Except for family 24, *ELF3<sub>Hsp</sub>* effects were

137 stronger in Dundee (United Kingdom). Here, the maritime climate in 2014 and 2015 was  
138 characterized with colder summers, more and equally distributed rain and greater day lengths  
139 compared to Halle (Germany) with moderate-to-continental growing conditions (Herzig *et al.*,  
140 2018). The contrasting effects between the two field locations suggested that the  $ELF3_{Hsp}$   
141 effect on heading depends on environmental cues. Furthermore, Herzig *et al.* (2019)  
142 mentioned  $ELF3_{Hsp}$  as potentially affecting grain nutrient content.  
143

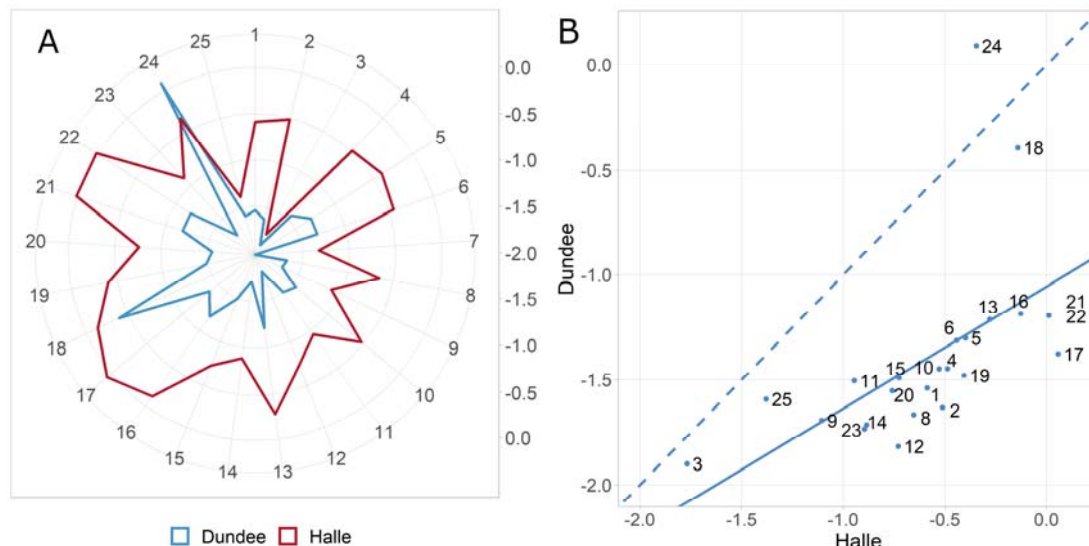

144  
145 **Fig. 1** Family-specific effect diversity of exotic  $ELF3$  ( $ELF3_{Hsp}$ ) alleles compared to the  
146 cultivated  $ELF3$  ( $ELF3_{Hv}$ ) alleles for the trait heading in days. Comparison of all 25 families  
147 of the barley nested association mapping (NAM) population HEB-25 from Herzig *et al.*  
148 (2018). (A) Each line of the radar plot shows the respective HEB family with its average  
149  $ELF3_{Hsp}$  effect in days. (B) Scatterplot comparing  $ELF3_{Hsp}$  flowering time effects in days  
150 between the two different locations Halle and Dundee. Regression line is shown as solid line  
151 and the dashed line is the diagonal separating effect strengths between the two locations.  
152 Pearson's correlation coefficient between locations is 0.6.

153  
154 However, despite these associations, causal data about the effect of natural  $ELF3$  variants on  
155 barley flowering time regulation and crop performance are lacking. As the selection of  
156 independent mutations at the  $ELF3$  locus might be a valuable tool to adapt barley cultivation  
157 to a wider range of environments (Faure *et al.*, 2012), the aim of this study was to investigate  
158 the influence of barley  $ELF3$  variants on several developmental and yield-related traits to  
159 subsequently identify  $ELF3$  alleles, which, in turn, may lead to an improvement of barley  
160 performance across environments. For this purpose, the barley NAM population HEB-25 was  
161 used as a basis for selection of Heterogeneous Inbred Families (HIFs). HIFs can be derived  
162 from advanced generations of lines with initial heterozygosity at a genomic region of interest.  
163 In this manner, allele effects can be estimated in a nearly isogenic background (Bergelson and

164 Roux, 2010; Tuinstra *et al.*, 1997). HEB-25 offers a diverse panel of wild barley alleles in a  
165 cultivated Barke background (Maurer *et al.*, 2015). HIFs can be derived from those expected  
166 6.25 % of BC<sub>1</sub>S<sub>3</sub> lines being heterozygous at the *ELF3* locus to examine its association with a  
167 phenotype, enabling a direct comparison of allele effects on traits between two nearly-  
168 isogenic sister HIF lines segregating for the homozygous exotic and cultivated genotypes at  
169 *ELF3*.

170 Besides time to flowering (HEA), additional phenological traits were investigated such as  
171 time to shooting (SHO), duration of shoot elongation (SEL), duration of ripening phase (RIP)  
172 and time to maturity (MAT). Furthermore, plant height (HEI), ears per square meter (EAR),  
173 grain number per ear (GNE), thousand grain weight (TGW) and grain yield (YLD) were  
174 investigated. Here, we describe significant effects of exotic *ELF3* variants on several  
175 agronomic performance traits and link them to the *ELF3* coding sequences and inferred *ELF3*  
176 protein types, making *ELF3* an attractive target for future climate-resilient breeding  
177 approaches in barley.

178

179

## 180 **Materials and methods**

### 181 *Plant material*

182 For this study, HIFs were selected from the multiparental barley NAM population HEB-25  
183 (Halle-Exotic-Barley (Maurer *et al.*, 2015)), which consists of 1,420 individual BC<sub>1</sub>S<sub>3</sub> lines  
184 that were developed by an initial cross of the spring barley cultivar Barke (*Hordeum vulgare*  
185 *ssp. vulgare*) with 25 highly divergent wild barley accessions (*Hordeum vulgare* *ssp.*  
186 *spontaneum* and *agriocrithon*). For detailed information about the population design, see  
187 Maurer *et al.* (2015). In this study, HIF pairs were derived from HEB lines in generation  
188 BC<sub>1</sub>S<sub>3:11</sub>, which were heterozygous at the *ELF3* locus in generation BC<sub>1</sub>S<sub>3</sub>. In addition, HIF  
189 pair 25\_002\_BC2 originates from a backcross of HEB line 25\_002 (BC<sub>1</sub>S<sub>3:7</sub>), carrying the  
190 *ELF3*<sub>Hsp</sub> allele, with Barke. Here, the HIF pair was selected from the segregating progeny of  
191 the resulting BC<sub>2</sub> plant. With the chosen plants, two years of field trials were conducted in  
192 2019 and 2020.

## 193 *Genotyping of HEB lines and HIF pairs*

194 For a preselection of potential HIFs, existing Infinium iSelect 50k single nucleotide  
195 polymorphism (SNP) genotype data of HEB-25 was used (Bayer *et al.*, 2017; Maurer and  
196 Pillen, 2019). Physical positions of SNPs were derived from the Morex reference sequence v2  
197 (refseq2) (Monat *et al.*, 2019). SNP data was first checked for quality, then an identity-by-  
198 state (IBS) matrix was created, coding homozygous Barke alleles as 0 and homozygous wild  
199 alleles as 2. Accordingly, heterozygous lines were coded as 1. Subsequently, the IBS matrix  
200 was converted to an identity-by-descent (IBD) matrix, as described in Maurer *et al.* (2017).  
201 This resulted in 32,995 SNP markers, which were used for preselection. Hereby, the first  
202 selection criterion was heterozygosity at the locus of interest, the *ELF3* gene  
203 (HORVU.MOREX.r2.1HG0078390.1). A gene specific marker (JHI\_Hv50k\_2016\_57670),  
204 which is located inside *ELF3*, and flanking markers were used to determine whether  
205 heterozygosity was present at the *ELF3* locus (Supplementary Table S1). Furthermore, lines  
206 showing heterozygosity at one of the other seven major flowering time loci in barley (Maurer  
207 *et al.*, 2015) were discarded from the preselection, to ensure that no additional segregation in  
208 the background of *ELF3* would compromise the effect estimation of *ELF3* on traits, especially  
209 flowering time. Fifty plants of each BC<sub>1</sub>S<sub>3:11</sub> line were grown and genotyped with kompetitive  
210 allele specific PCR (KASP) markers covering the *ELF3* region (Supplementary Table S2,  
211 (Semagn *et al.*, 2014)) at TraitGenetics GmbH, Gatersleben, to select an *ELF3* HIF pair made  
212 of two nearly-isogenic lines segregating for *ELF3*<sub>Hv</sub> and *ELF3*<sub>Hsp</sub>. During the field trial 2019,  
213 the genotypes of selected HIF pairs were validated by TraitGenetics with the barley Infinium  
214 iSelect 50k chip (Bayer *et al.*, 2017) and, subsequently, converted to an IBD matrix as  
215 described above (Supplementary Table S3).

## 216 *Field trials*

217 In both years, 2019 and 2020, field trials were conducted at the ‘Kühnfeld Experimental Field  
218 Station’ of Martin Luther University Halle-Wittenberg (51°29'46.47"N; 11°59'41.81"E) to  
219 gather phenotypic data for 12 selected HIF pairs. Both field trials were sown in March, with  
220 fertilization and pest management carried out according to local practice. In 2019, the field  
221 trial was conducted in a randomized complete block design consisting of four blocks, each  
222 containing a randomized replication of the 12 selected HIF pairs. The plots consisted of 3  
223 rows (50 seeds each) with a length of 1.5 m and a distance of 0.15 m between rows. Plots  
224 were evenly spaced by 0.3 m. The field trial in 2020 was conducted in six randomized blocks.  
225 The plots consisted of 8 rows with a length of 3.2 m, a distance of 0.15 m between rows,

226 0.3 m between plots and a seeding density of 300 seeds per m<sup>2</sup>. Both sister lines of a HIF pair  
227 were always sown next to each other for comparison and to minimize spatial effects.  
228 Additionally, elite donor Barke was placed as a control in 27 plots in 2019 and 11 plots in  
229 2020.

### 230 *Environments*

231 The growth period had the same length in both years, only in 2020, sowing was carried out  
232 two weeks later than in 2019. Therefore, maturity of the latest line was two weeks earlier in  
233 2019. During the respective growth periods of the field trials, the mean temperature was  
234 0.5 °C higher in 2020 (13.4 °C), especially in the third month of the vegetation period when  
235 heading started, temperature was on average 3 °C higher in 2020. However, during the last  
236 month of the respective growth period, temperature was almost 2 °C higher in 2019 (21.3 °C)  
237 with high daily average temperatures of up to 29 °C. In 2020, the highest daily average  
238 temperature was 23.8 °C. The sum of precipitation over the whole growth period was almost  
239 the same in both years (approx. 127 mm). While in 2019 rainfalls occurred during spring,  
240 directly after sowing and equally distributed over the summer, almost no rain occurred during  
241 the first third of the vegetation period and almost 50 % of rain during the last month of the  
242 vegetation period in 2020 (Supplementary Fig. S1). Due to later sowing in 2020, the day was  
243 one hour longer in the beginning of the experiment in 2020 and the longest day was later in  
244 the vegetation period in 2019 than in 2020, leading to a larger absolute amount of daylight in  
245 2020.

### 246 *Phenotypic data*

247 Phenotypic data were recorded in both years for ten developmental and yield-related traits  
248 (Table 1). For the developmental traits SHO until MAT, growing degree days (GDD) were  
249 calculated following equation (1) of McMaster and Wilhelm (1997) with a base temperature  
250 of 0 °C. The decision, for which trait days or GDD was used, is based on estimated  
251 repeatabilities (Rep) and heritabilities (H<sup>2</sup>) (Supplementary Note S1, Supplementary Table  
252 S4).

253

254



255 **Table 1** List of evaluated traits.

| Abbr. <sup>a</sup> | Trait                   | Units | Method of measurement                                                                                                                                                                   |
|--------------------|-------------------------|-------|-----------------------------------------------------------------------------------------------------------------------------------------------------------------------------------------|
| SHO                | Time to shooting        | days  | Number of days from sowing until first node noticeable 1 cm above tillering node (BBCH 31; (Lancashire <i>et al.</i> , 1991)) for 50% of all plants of a plot.                          |
| SEL                | Shoot elongation phase  | GDD   | Time from SHO to HEA.                                                                                                                                                                   |
| HEA                | Time to heading         | days  | Number of days from sowing until first awns are visible (BBCH 49; (Lancashire <i>et al.</i> , 1991)) for 50% of ears on main tillers of a plot.                                         |
| RIP                | Ripening phase          | days  | Time from HEA to MAT.                                                                                                                                                                   |
| MAT                | Time to maturity        | GDD   | Number of days from sowing until hard dough: grain content firm and fingernail impression held (BBCH 87; (Lancashire <i>et al.</i> , 1991)) for 50% of all plants of a plot.            |
| HEI                | Plant height            | cm    | Average plant height of all plants of a plot at maturity; measured from ground to tip of erected ear (without awns).                                                                    |
| EAR                | Ears per m <sup>2</sup> |       | Number of ears per m <sup>2</sup> ; counted by using a representative 50 cm frame in the centre of a plot and extrapolated to 1 m <sup>2</sup> .                                        |
| GNE                | Grain number per ear    |       | Number of grains per ear; based on a representative sample of 10 harvested ears and recorded with the MARVIN seed analyser (GTA Sensorik GmbH, Neubrandenburg, Germany).                |
| TGW                | Thousand grain weight   | g     | Weight of 1,000 grains; extrapolated after harvest with MARVIN seed analyser based on a representative sample of 10 ears. Before, seeds were cleaned and damaged seeds were sorted out. |
| YLD                | Grain yield             | dt/ha | For each plot, total grain yield was calculated based on the yield parameters EAR, GNE and TGW and extrapolated to dt/ha.                                                               |

256

257 <sup>a</sup> Abbreviation of traits.

258 *ELF3* coding and protein sequence

259 The full-length genomic sequence of *ELF3*, from original wild barley donors, Barke,  
260 Bowman and BW290, was amplified using Ex Taq DNA Polymerase (Takara Bio, Kusatsu,  
261 Shiga, Japan). The purified amplicons were submitted to Eurofins Genomics (Ebersberg,  
262 Germany) for dideoxy sequencing. Five to six overlapping fragments were assembled, and the  
263 coding sequence was then obtained by alignment with the reported *ELF3* sequence from  
264 cultivar Igri (GeneBank accession number HQ850272; (Faure *et al.*, 2012)). Subsequently,  
265 the protein sequences were obtained by using ExpASY translate tool (Gasteiger *et al.*, 2003).  
266 Primers used for PCR and sequencing are given in Supplementary Table S5.  
267 Structure of Barke *HvELF3* was visualized by using Exon-Intron Graphic Maker (Bhatla,  
268 2012) available at <http://wormweb.org/exonintron> (accessed November 29, 2021). AtELF3  
269 protein (Col-0) was obtained at <https://www.arabidopsis.org/> (AT2G25930,  
270 (The Arabidopsis Information Resource (TAIR)), accessed November 29, 2021) and three

271 AtELF3 protein domains were defined according to Nieto *et al.* (2015). For alignment with  
272 AtELF3, Barke ELF3 was obtained as described above and Morex ELF3 sequence from  
273 Morex reference sequence v2 (Monat *et al.*, 2019). Alignment of AtELF3 and HveLF3 (of  
274 Barke/Morex) sequences was done using MAFFT version 7 (Kato *et al.*, 2019; Kuraku *et al.*,  
275 2013) available at <https://mafft.cbrc.jp/alignment/server/> (accessed November 29, 2021) and  
276 subsequently, the respective HveLF3 protein domains were retrieved.

### 277 *ELF3 sequence structure analysis*

278 For global structure prediction a local installation of Alphafold v2.1.0 (Jumper *et al.*, 2021)  
279 with max\_template\_date=2021-10-12 and model\_preset=monomer\_ptm was used. Results  
280 were analysed by an in-house python script (available upon request).

281 To identify structural homologues, the BLASTp webserver with the database “Protein Data  
282 Bank proteins (pdb)” and the ELF3 sub-sequences “SSRGSELQWSSAASSPFDRQ” and  
283 “SSRGSELQGSSAASSPFDRQ” were used. The derived hits were analysed by an in-house  
284 PyMOL script (available upon request) regarding their structural completeness (min. 5  
285 resolved residues in the pdb file) and their annotated secondary structure. The weblogo was  
286 generated using the Berkley weblogo webserver (Crooks *et al.*, 2004).

287 For disorder analysis, the amino acid sequences of the barley homologues from the annotated  
288 Arabidopsis proteins were identified using BLASTp. A local installation of the MobiDB-lite  
289 suite (Necci *et al.*, 2017) was used to predict the disorder content of the derived sequences.

### 290 *Image-based phenotyping in controlled environments*

291 To validate barley *ELF3* effects in a controlled environment, a phenotyping experiment was  
292 conducted using the LemnaTec system at the Leibniz Institute of Plant Genetics and Crop  
293 Plant Research (IPK) in Gatersleben. One HIF pair (10\_190), the cultivar Bowman and two  
294 *elf3* mutants in a Bowman background (BW289 and BW290, carrying the *eam8.k* and *eam8.w*  
295 alleles, respectively (Faure *et al.*, 2012; Zakhrabekova *et al.*, 2012)), were grown for 64 days  
296 under standard conditions with day/night temperatures of 20°C/18°C and long days (LD) with  
297 16h light and 8h darkness, respectively. Top- and side-view RGB images (LemnaTec  
298 automatic phenotyping system at IPK Gatersleben) from each plant were taken every day  
299 after day 8 and every two to four days after day 33. All analysed growth and developmental  
300 parameters were scored from these images. To obtain data for plant height, area and volume,  
301 the Integrated Analysis Platform (IAP) pipeline was used (Klukas *et al.*, 2014). Number of

302 tillers was counted manually on day 64 (all tillers were included). On day 64, the aerial parts  
303 of the plants were harvested, and fresh weight was measured using an electronic scale. Dry  
304 weight was measured after placing plant material into a drying oven for 3 days at 80°C.

### 305 *Statistical analyses*

306 All statistical analyses were performed either with SAS 9.4 (SAS Institute Inc., Cary, NC,  
307 USA) or R 3.4.3 (R Development Core Team, Vienna, Austria). Basic descriptive statistics  
308 and comparative statistics between HIF sister lines were calculated in R using the  
309 `compare_means` method ANOVA. SAS PROC HP MIXED was used to estimate best linear  
310 unbiased estimators (BLUEs), assuming fixed genotype and block effects in a linear mixed  
311 model. Pearson's correlation coefficients were calculated using the CORRGRAM package in  
312 R. BLUEs were used for calculation of correlation of traits across years and individual values  
313 were used for correlation of traits within a year.

314 Repeatabilities (Rep) for each year and broad-sense heritabilities ( $H^2$ ) were calculated as

$$315 \quad Rep = \frac{V_G}{V_G + \frac{V_F}{r}} \quad \text{and} \quad H^2 = \frac{V_G}{V_G + \frac{V_{GY}}{y} + \frac{V_F}{yr}},$$

316 where  $V_G$ ,  $V_{GY}$  and  $V_F$  correspond to the genotype, genotype  $\times$  year and error variance  
317 components, respectively. The terms  $y$  and  $r$  represent the number of years and replicates,  
318 respectively. For estimation of variance components with SAS procedure PROC VARCOMP,  
319 all effects were assumed to be random. Furthermore, an ANOVA was conducted for each trait  
320 to test for significant genotype and year effects as well as for significant genotype  $\times$  year  
321 interactions.

## 322 **Results and discussion**

### 323 *High diversity in ELF3 protein sequences*

324 In order to understand the sequence variations of HvELF3, we sequenced the full-length  
325 genomic DNA of *ELF3* (Fig. 2A) from original wild barley donors and Barke. After  
326 identifying the *ELF3* coding sequence of all wild barley donors (Supplementary Table S6),  
327 the *ELF3* protein sequences were determined (Supplementary Table S7) and 19 different  
328 protein types/proteofoms could be distinguished (Supplementary Table S8), whereof 9 were  
329 present in the field trials (Fig. 2C) due to the above mentioned selection criteria for HIF lines.  
330 Amino-terminal (N), middle (M) and carboxyl-terminal (C) regions of HvELF3 protein were  
331 identified based on the comparison with AtELF3 (Fig. 2B), where these regions were shown  
332 to interact with different proteins (Herrero *et al.*, 2012; Liu *et al.*, 2001; Nieto *et al.*, 2015; Yu  
333 *et al.*, 2008).  
334

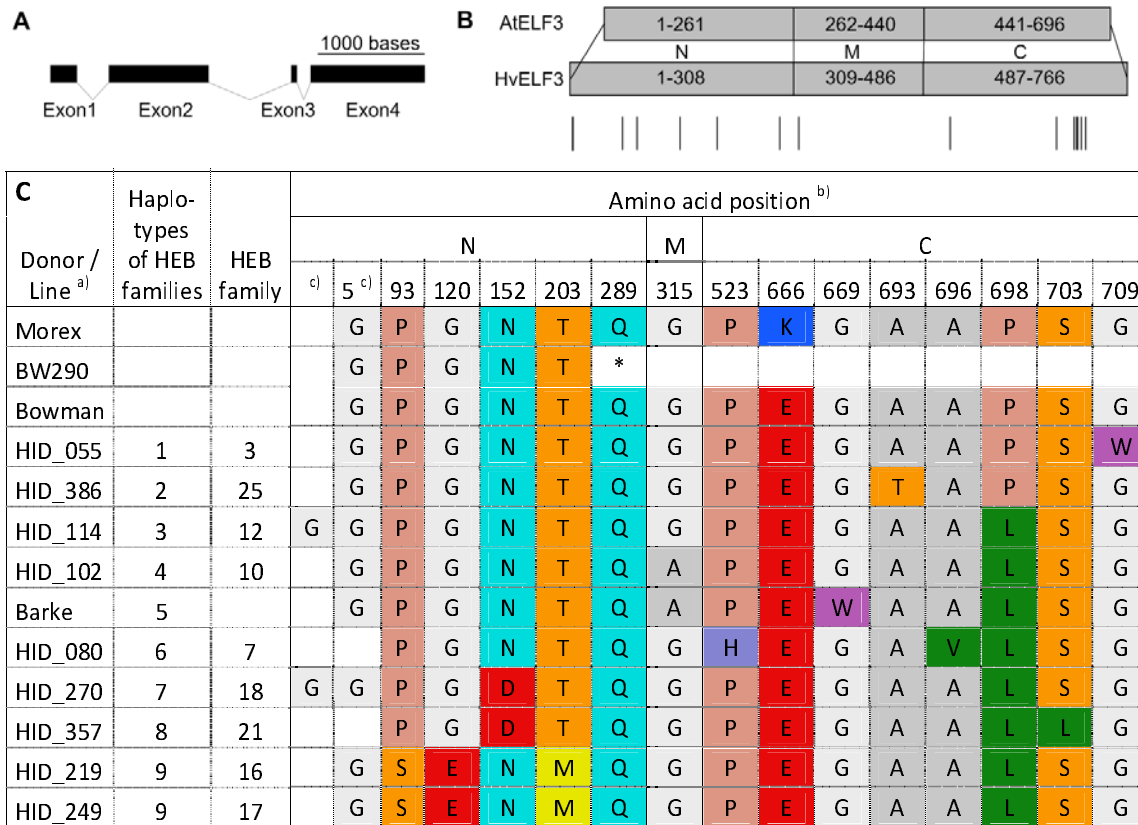

336 **Fig. 2** ELF3 protein structure and sequence polymorphisms. **(A)** Structure of the *HvELF3*  
 337 gene in barley (Barke). Exons are shown as black rectangles and introns as connecting lines.  
 338 **(B)** Domain mapping and their sequence annotation between the Arabidopsis (Col-0) ELF3  
 339 protein (AtELF3) and Barke/Morex ELF3 protein (HvELF3). Numbers indicate amino acid  
 340 positions of amino-terminal (N), middle (M) and carboxyl-terminal (C) protein domains.  
 341 Amino acids 696 and 766 are the STOP codons for AtELF3 and HvELF3, respectively. Lines  
 342 beneath HvELF3 mark sites of amino acid substitutions and insertion or deletion between  
 343 HIFs used in field trials (as indicated in C). **(C)** ELF3 protein sequence polymorphisms of all  
 344 alleles present in the field trials, Morex, Bowman and BW290. Only the amino acid positions  
 345 with variation between the families are shown. One-letter amino acid abbreviations (JCBN,  
 346 1984) were used and the asterisk shows a stop codon. a) HID = ‘hordeum identity’; name of  
 347 the donor accession. b) N, M and C regions of barley ELF3 were obtained by alignment of the  
 348 Barke/Morex sequence with the Arabidopsis sequence and Barke/Morex/Bowman sequences  
 349 were used as references for the amino acid positions. c) Between position 4 and 5 some lines  
 350 have an insertion and at position 5 some lines have a deletion of one amino acid, compared to  
 351 the Barke amino acid sequence.

352

353 In Arabidopsis, the N region is required to interact with PHYTOCHROME B (PHYB) and  
 354 CONSTITUTIVE PHOTOMORPHOGENIC 1 (COP1) (Liu *et al.*, 2001; Yu *et al.*, 2008), the  
 355 M region with EARLY FLOWERING 4 (ELF4) and GIGANTEA (GI) (Herrero *et al.*, 2012;  
 356 Yu *et al.*, 2008) and the C region with PHYTOCHROME-INTERACTING FACTOR 4  
 357 (PIF4) (Nieto *et al.*, 2015). Huang *et al.* (2017) could already show that ELF3 in  
 358 *Brachypodium distachyon*, a grass which is closely related to barley, interacts with almost the

359 same set of proteins *in vivo*. While the mutation in BW289 (*eam8.k*) contains two deletions,  
360 one inversion and two small insertions ((Zakhrabekova *et al.*, 2012), data not shown), BW290  
361 (*eam8.w*) has a C-to-T point mutation, resulting in a premature stop codon (Fig. 2C), leading  
362 to truncated proteins in both mutants (Faure *et al.*, 2012). Since the M and C regions are  
363 absent in BW290 and since this line is flowering early (Ejaz and von Korff, 2017; Faure *et al.*,  
364 2012; Zakhrabekova *et al.*, 2012), also naturally occurring mutations in these regions may  
365 influence the role of barley ELF3. Also, for the wild barley donors, most amino acid  
366 differences were observed in the N and C region. Amino acid variation at positions 315, 669  
367 and 698 were also described in Casas *et al.* (2021) for the two cultivars Beka and Logan and  
368 suggested to be associated with differences in flowering time. Apart from that, phenotypic  
369 differences are likely to be sought also on the *cis*-regulatory level.

370 Particularly interesting is that the donors of family 16 and 17 have exactly the same protein  
371 sequence and the exotic ELF3 in family 10 (HID\_102) only differs in one amino acid from  
372 the cultivated ELF3 of Barke. This amino acid is located at position 669 in the C-terminal  
373 region of the ELF3 protein (Fig. 2C). In Arabidopsis, the C-terminal region of ELF3 binds the  
374 PIF4 basic helix–loop–helix (bHLH) domain which subsequently prevents PIF4 from  
375 activating its transcriptional targets (Nieto *et al.*, 2015). The *PIF4* gene in Arabidopsis  
376 controls thermomorphogenesis (Koini *et al.*, 2009; Quint *et al.*, 2016), which refers to  
377 morphological changes dependent on the ambient temperature. It regulates auxin biosynthesis,  
378 thermosensory growth, adaptations and reproductive transition (Franklin *et al.*, 2011;  
379 Gangappa *et al.*, 2017; Koini *et al.*, 2009; Kumar *et al.*, 2012). Previous studies have shown  
380 that variation in *PIF4* expression and elongation growth can be explained by genetic variation  
381 in *AtELF3* (Box *et al.*, 2015; Raschke *et al.*, 2015).

382 *W669G substitution affects protein structure of ELF3 and induces disorder-driven phase*  
383 *separation events forming local nano-compartments*

384 To evaluate potential impacts of this minimal change in the protein sequence between ELF3<sub>Hv</sub>  
385 and ELF3<sub>Hsp</sub>, we performed a sequence/structure-based analysis to identify possible effects of  
386 the W669G substitution observed in HvELF3 at the protein level. Based on InterPro (Blum *et al.*  
387 *et al.*, 2021), no domain is known for barley ELF3, as well as for the better annotated  
388 Arabidopsis homologue. Sensitive Markov search with HHPred (Gabler *et al.*, 2020) revealed  
389 helical content with low confidence for residues 373–395. Utilizing the state-of-the-art  
390 AlphaFold2 algorithm (Jumper *et al.*, 2021), the entire structure of the Barke protein and also  
391 the protein of HID\_102, the exotic donor of HEB family 10, with the substitution was

392 predicted (Fig. 3A-B). Interestingly, high disorder content is predicted, and, as expected, the  
393 W669G substitution is also localized in those regions (Fig. 3A,B).

394 We next asked if the local structural preferences of this substitution could be altered. To  
395 answer this, we selected the subsequence 661-680 and structural homologues were identified  
396 by BLASTp. Identified results were filtered, using a threshold of a minimum of 5 resolved  
397 residues in the determined structure and annotated secondary structure was retrieved. In total,  
398 52 and 34 structures were identified for the Barke and HID\_102 sequence regions,  
399 respectively (Supplementary Table S9). Notably, the identified structural homologues for the  
400 Barke sequence have a conserved Tryptophan at position 9, whereas HID\_102 showed lower  
401 conservation of the substituted Glycine (Fig. 3C-F). Analysing the secondary structure  
402 content of identified homologues revealed deviations in local folding preference (Fig. 3D,F,  
403 Supplementary Table S9). For Barke, the region folds in  $\alpha$ -helical,  $\beta$ -sheet and coil  
404 conformations with equal occurrence. For the variant W669G in HID\_102, a dramatic  
405 decrease in  $\beta$ -sheet occurrence is derived (Fig. 3F). Glycine, besides Proline, is a known  $\beta$ -  
406 sheet breaker (Minor and Kim, 1994; Smith *et al.*, 1994), corroborating this observation with  
407 possible effects on higher-order hydrogen bonding patterns.

408

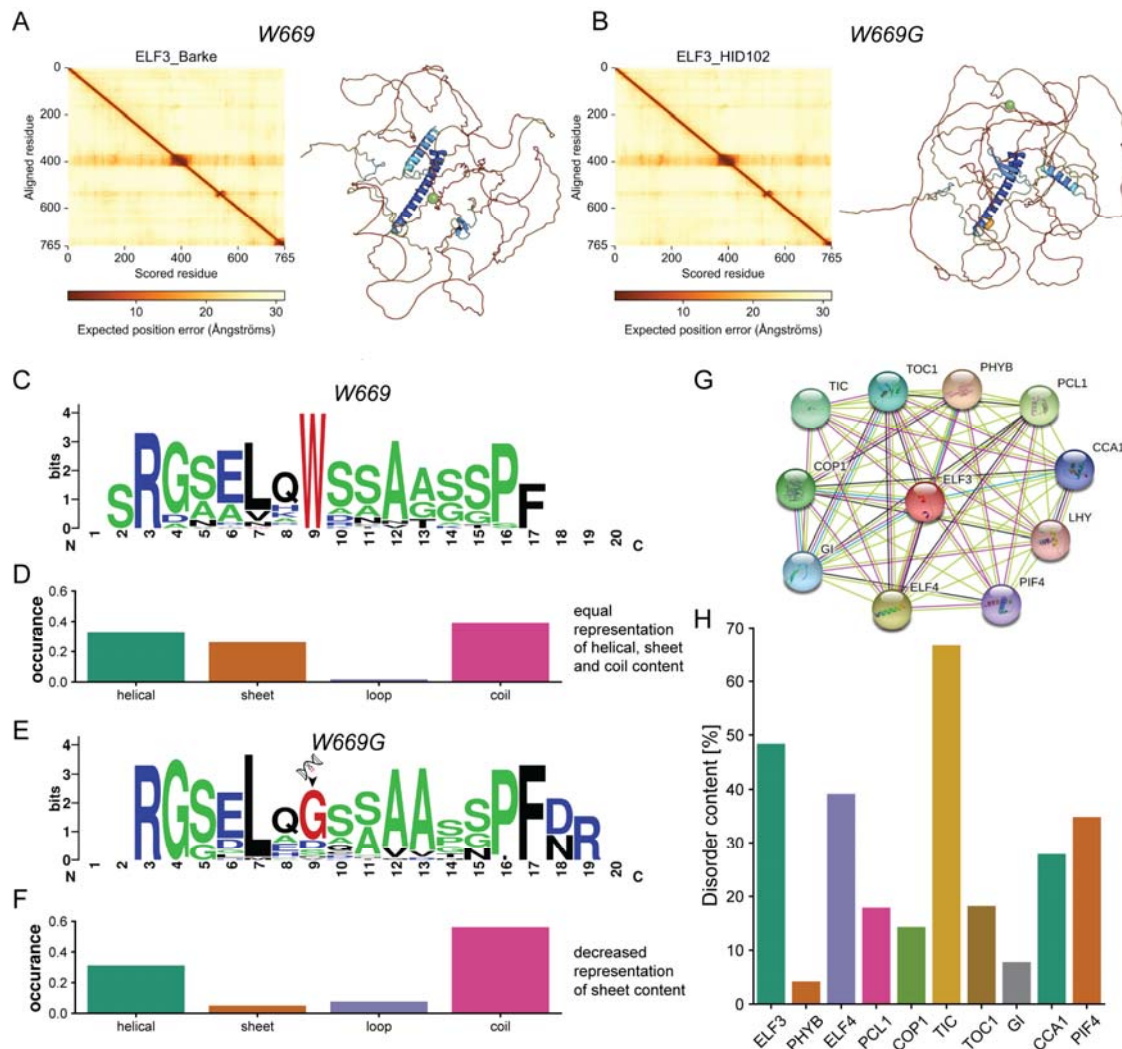

409

410 **Fig. 3** Sequence and structural analysis of the W669G substitution. (A-B) AlphaFold2  
 411 prediction of the Barke and HID\_102 sequence of ELF3. Models are coloured by their  
 412 respective pLDDT scoring, which indicates the reliability of the derived model. The Ca  
 413 atom of the mutation site is highlighted as a green sphere. (C-F) Local analysis of homologous  
 414 structures. (C, E) Weblogo of the identified homologues for structures for Barke (W669) and  
 415 substituted HID\_102 (W669G) sequence. The site of the amino acid substitution at position 9  
 416 is highlighted red, residues, prone to be in disordered regions, are highlighted in green,  
 417 and charged residues in blue. (D, F) Statistical occurrence of secondary structure element in the  
 418 identified structures. (G-H) Interaction analysis and disorder prediction for ELF3 and  
 419 interaction partners. (G) STRING-network for ELF3 from Arabidopsis. (H) Disorder content  
 420 of the barley proteins interacting with ELF3.

421

422 ELF3 contains high content of unstructured/disordered protein regions (Fig. 3A) and, locally,  
 423 these regions can transition equally to various secondary structure elements as shown by our  
 424 analysis (Fig. 3D,F). Disordered protein regions are often linked to phase separation events  
 425 (Majumdar *et al.*, 2019), forming local nano-compartments in the cell. Given the fact that  
 426 AtELF3 itself phase-separates (Jung *et al.*, 2020), this substitution can well affect its



427 behaviour. Another, less obvious effect could be in the context of its local cellular  
428 interactions, and, we therefore analysed its annotated cellular community. Based on the  
429 STRING (Szklarczyk *et al.*, 2021) entry of the homologous protein from Arabidopsis,  
430 AtELF3 has 10 described interaction partners identified using the default criteria (Fig. 3G).  
431 We identified the respective barley proteins using BLASTp and analysed the disorder content  
432 utilizing the MobiDB-lite algorithm (Necci *et al.*, 2017) (Supplementary Table S10). The  
433 majority of the interaction partners show high disorder content as well with a mean value of  
434 28 % when considering their full sequences (Fig. 3H). Based on this, the effect of this W669G  
435 substitution might not only affect the phase separation behaviour of ELF3, but might also be  
436 involved in disorder-driven phase separation events within its cellular community.

437 The substitution of residue 669 from Tryptophane to Glycine might play an essential role in  
438 regulating a function in a higher-order assembly. This is because (a) the Tryptophane-  
439 containing sequence can adopt all types of secondary structure, whereas the Glycine  
440 substitution induces a reduced  $\beta$ -sheet content due to the sheet-breaking properties of Glycine.  
441 This might directly affect secondary structure transitions, needed in disordered regions to  
442 adapt for self-interacting (as in the case of AtELF3 (Jung *et al.*, 2020)) or/and interacting with  
443 different interaction partners and thereby influencing complex composition and higher-order  
444 community 3D architecture (Kim and Han, 2018); (b) Tryptophane contains a delocalized  $\pi$ -  
445 electron system in its side chain, and is thereby able to form  $\pi$ - $\pi$ ,  $\pi$ -stacking and cation- $\pi$   
446 interaction networks. This interaction seems to play an essential role in the process of phase  
447 separation (Vernon *et al.*, 2018). The analysed substitution might thereby directly affect the  
448 properties underlying nano-compartment formation and, ultimately, regulate a functional  
449 complex to perform function with distinct phenotypic consequences.

#### 450 *Genetic constitution of the HIF pairs beyond ELF3*

451 An inspection of the genetic background in HIF sister lines was carried out using the data  
452 from the 50k iSelect SNP chip (Supplementary Table S3). The genotyping results confirmed  
453 the status of the fixed homozygous *ELF3* alleles in all HIF sister lines. For the additional  
454 seven main flowering time loci found in the previous HEB-25 QTL studies (Maurer *et al.*,  
455 2015), it was possible to verify that HIF sister lines exhibited the same fixed homozygous  
456 alleles (Supplementary Table S11). Unexpectedly, in HIF 12\_001, the two sister lines showed  
457 differently fixed homozygous alleles at the *CENTRORADIALIS* (*CEN*) gene (Comadran *et al.*,  
458 2012), although its HEB-25 progenitor showed a homozygous *CEN<sub>Hsp</sub>* genotype in generation  
459 BC<sub>1</sub>S<sub>3:8</sub> (Supplementary Table S1, (Maurer and Pillen, 2019)).

460 Initially, we aimed for HIF pairs that would only segregate at the *ELF3* locus, but additional  
461 segregating loci between the HIF sister lines were obtained (Supplementary Fig. S2,  
462 Supplementary Table S12). Genes in these regions could possibly interfere with and have an  
463 influence on the studied traits and mask the *ELF3*<sub>Hsp</sub> effect. However, for a selection of genes  
464 that are already known to control flowering time or to interact with AtELF3, for example  
465 LUX and PIF4 (Nieto *et al.*, 2015; Nusinow *et al.*, 2011), most of the studied HIF pairs  
466 already share the same homozygous alleles (Supplementary Table S13). Nevertheless, there  
467 could be genes that are still unknown to be involved in the flowering time control pathway  
468 and the circadian clock. Of course, as few as possible additionally segregating loci are  
469 desirable. In this context, HIF pairs derived from HEB-25 lines 10\_003, 10\_190, 12\_111 and  
470 21\_040 with only a few additional segregating regions are especially interesting (< 1 % of the  
471 whole genome, Supplementary Table S12).

472 HIFs 10\_003 and 10\_190 originate from the same exotic donor just like HIFs 12\_001, 12\_111  
473 and 12\_154. Comparing these HIFs among each other regarding their genomic background,  
474 revealed contrasting alleles at five further flowering time loci for HIFs from family 10 (*PPD-*  
475 *H1*, *CEN*, *QFt.HEB25-4a*, *VRN-H1* AND *VRN-H3/FT1* (Maurer *et al.*, 2015), Supplementary  
476 Table S11) and at three further flowering time loci for HIFs from family 12 (*PPD-H1*,  
477 *sdw1/denso* and *VRN-H1* (Maurer *et al.*, 2015), Supplementary Table S11). Also for other  
478 genes that are known to be involved in controlling flowering time, contrasting alleles were  
479 found for *GI*, *LUX*, *ELF4* and *PIF4* for HIFs in family 10 and for *GI*, *LUX*, *CO*, *ELF4*, *Ppd-*  
480 *H2*, *PIF4* in family 12 (Supplementary Table S13).

#### 481 *Phenotypic variation requires year-by-year analysis*

482 We observed broad variation for all traits, both between genotypes and years (Supplementary  
483 Fig. S3, Tables S14 and S15) with medium high coefficients of variation (CV) in both years.  
484 As expected, for the elite parent and control cultivar Barke, the CV was not as high as the CV  
485 across the studied HIF pairs. CVs for YLD are particularly high, which can be explained by  
486 the high variation of EAR. An ANOVA revealed significant ( $p < 0.001$ ) effects for genotype  
487 and year as well as for genotype  $\times$  year interaction except for TGW between the two years  
488 and TGW and EAR for genotype  $\times$  year interaction (Supplementary Table S16). In 2020, for  
489 all developmental traits, except RIP and SEL [GDD], plants showed a faster development  
490 than in 2019 (Supplementary Table S15). For the trait SEL, plants showed a faster  
491 development in 2020 when comparing this growth phase in days, while GDD values were  
492 lower in 2019, showing that the average temperature in 2020 was higher during this growth

493 period than in 2019. Furthermore, plants were smaller in 2020 and all yield components had  
494 lower values. Especially yield was unexpectedly low in 2020. Presumably, the generally  
495 faster phenological development in 2020 led to a shorter growth period (e.g. due to different  
496 weather conditions (Supplementary Fig. S1)) and left the plants less time for assimilation,  
497 grain filling and biomass production, resulting in smaller plants, lower yield components and,  
498 consequently, less grain yield. The average grain yield for spring barley in Germany in 2020  
499 was 55.6 dt/ha (Federal Ministry of Food and Agriculture, 2020). In this study, YLD was very  
500 high in 2019 (97.6 dt/ha) whereas in 2020 it was far below (38.8 dt/ha). Due to the small plot  
501 size in 2019, yield was probably overestimated. Repeatabilities (Rep) for YLD confirm this,  
502 as Rep for YLD in 2019 is much lower than for YLD in 2020 (Supplementary Table S4).  
503 Barke, as a control, confirms that as well, as it had a yield of 127.4 dt/ha in 2019 and  
504 60.7 dt/ha in 2020. The latter amount is consistent with the average yield of 59.5 dt/ha for  
505 Barke in a previous study in Halle (Wiegmann *et al.*, 2019). In this case, HEB lines also  
506 showed lower yields than Barke.  
507 Consequently, in addition to the ANOVA, the descriptive statistics emphasize the difference  
508 between the two trial years (Supplementary Fig. S3), meaning that differences in  
509 developmental and yield-related traits between the two years can mainly be explained by  
510 different environmental conditions (Supplementary Fig. S1). As a consequence, both years  
511 were evaluated separately. Correlations support this decision (Supplementary Fig. S3 and S4).  
512 High repeatabilities and heritabilities (Supplementary Table S4) indicate that the  
513 measurements are reliable (Note S1). Furthermore, separate yearly evaluation is interesting  
514 since barley *ELF3* effects have already been shown to vary depending on the environment  
515 (Herzig *et al.*, 2018).

#### 516 *Comparison of HIFs reveals effects of ELF3 alleles depending on the genetic background*

517 Trait performance for each HIF line and the difference between HIF sister lines carrying the  
518 wild *ELF3<sub>Hsp</sub>* and the elite *ELF3<sub>Hv</sub>* alleles, respectively, were calculated per year  
519 (Supplementary Table S14). Furthermore, descriptive statistics for each HIF sister line in each  
520 year can be found in Supplementary Table S17.

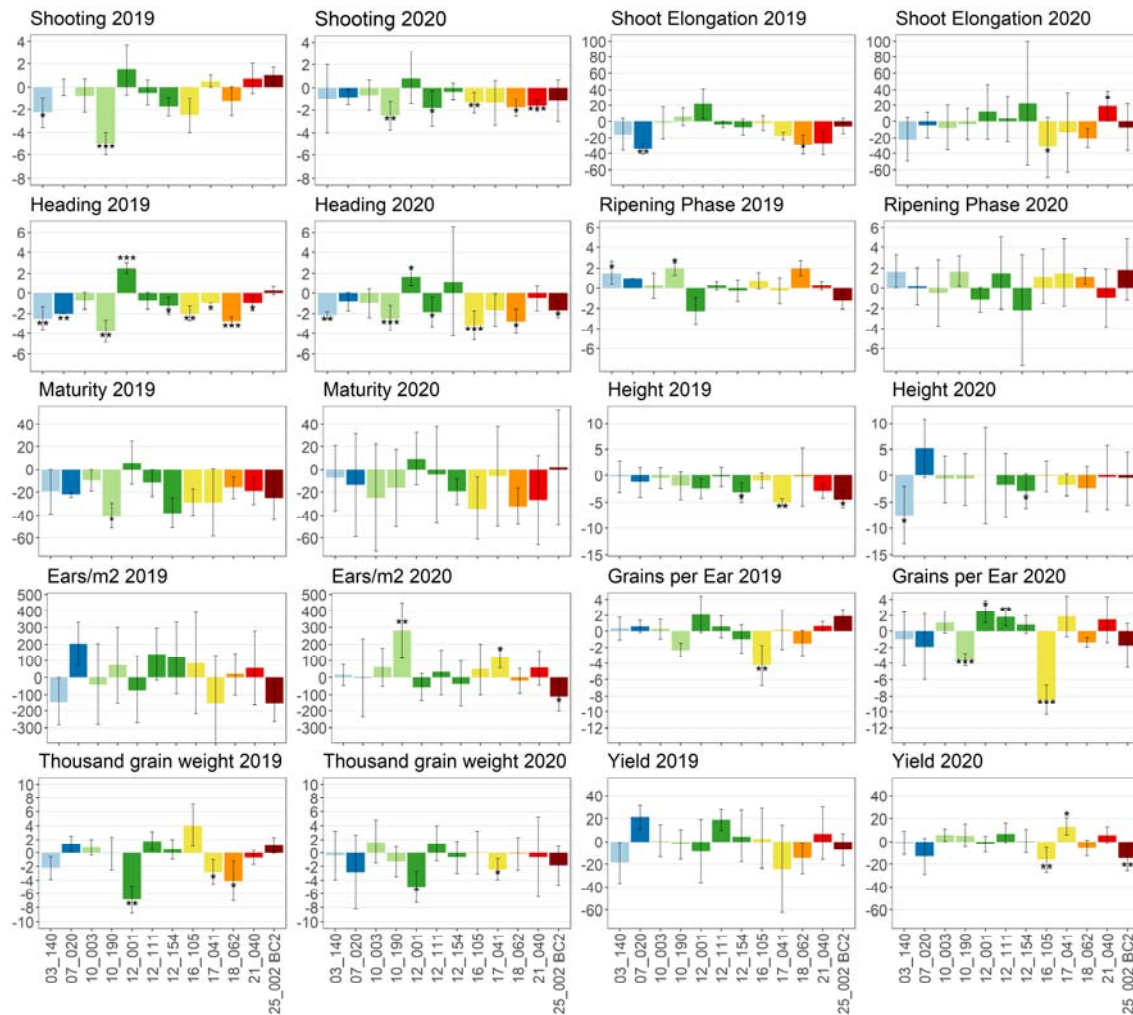

521

522 **Fig. 4** Trait differences between the two sister lines of each HIF pair ( $ELF3_{Hsp}$  compared to  
 523  $ELF3_{Hv}$ ) per year. Lines with two identical first digits originate from the same wild donor.  
 524 Trait units are given in Table 1. Asterisks indicate a significant difference between sister lines  
 525 (one-way ANOVA, \* $p < 0.05$ , \*\*  $p < 0.01$  and \*\*\*  $p < 0.001$ ) and error bars show standard  
 526 deviations. For calculation of standard deviations, differences for each HIF pair per block  
 527 were calculated and thereof, means and standard deviations were computed. Columns are  
 528 coloured depending on the  $ELF3$  haplotype defined in Fig. 2C.

529

530 In general, HIF sister lines carrying an  $ELF3_{Hsp}$  allele showed an accelerated plant  
 531 development and reduced plant height in both years (Fig. 4). These findings confirm  $Hsp$   
 532 allele effects estimated by means of genome-wide association studies in previous trials  
 533 (Herzig *et al.*, 2018; Maurer *et al.*, 2016). Also, family-specific effect variation of  $ELF3_{Hsp}$   
 534 alleles could be seen as in Herzig *et al.* (2018). However, the yield parameters EAR, GNE and  
 535 TGW as well as YLD showed different effect directions.

536 Several significant effect differences were found, especially for SHO and HEA, whereof most  
 537 could be confirmed in both years. The strongest effects were found in HIF 10\_190, where

538 SHO was up to 5.00 days earlier for the *ELF3<sub>Hsp</sub>* allele, for HEA up to 3.75 days earlier and  
539 for MAT up to 40.39 GDD earlier, which corresponds to 1.75 days in 2019 (Supplementary  
540 Table S14). HIF 10\_190 is particularly interesting, as only a few additional segregating  
541 regions are present (< 1 % of the whole genome, Supplementary Tables S12 and S18) and  
542 significant effect differences could be found for the traits SHO, HEA, RIP, MAT, EAR and  
543 GNE. As indicated before, the *ELF3* protein in HEB family 10 differs from *ELF3* in Barke  
544 only at the above mentioned position 669 (W669G, Fig. 2C). This amino acid is located in the  
545 C-terminal *ELF3* region, which is known to bind PIF4 in Arabidopsis, responsible for the  
546 regulation of growth processes (see chapter 'High diversity in *ELF3* protein sequences'). As  
547 described above, this specific amino acid substitution leads to significant folding deviations  
548 regarding the secondary structure of *ELF3* (Fig. 3) and might play an essential role in  
549 regulating a function higher-order assembly which might ultimately lead to distinctly different  
550 phenotypes. The significant effects of the *ELF3<sub>Hsp</sub>* allele in HIF 10\_190 on plant  
551 developmental traits and on EAR and GNE may also involve W669G, which is, however, also  
552 shared by *Hsp* alleles of all other HIFs (Fig. 2C). Interestingly, the strong phenotypic effects  
553 of 10\_190 could not be observed in 10\_003 although they share an identical *ELF3* protein  
554 sequence, indicating the presence of further factors determining the *ELF3<sub>Hsp</sub>* allele effect  
555 differences. As already mentioned above, HIFs 10\_003 and 10\_190 contain contrasting alleles  
556 at five further flowering time loci ((Maurer *et al.*, 2015), Supplementary Table S11) and also  
557 for other genes known to be involved in the control of flowering time (Supplementary Table  
558 S13). Of special interest are *PPD-H1* and *PIF4*. Since W669G potentially affects structural  
559 properties within the PIF4-interacting C region, *ELF3*-PIF4 interaction could be affected by  
560 naturally occurring alleles. Hence, contrasting alleles at *PIF4* might be a reason for stronger  
561 phenotypic effects in 10\_190 compared to 10\_003. As for *PPD-H1*, the wild allele has shown  
562 the strongest influence on flowering time and also on other traits (Herzig *et al.*, 2018; Maurer  
563 *et al.*, 2016). Here, the *ELF3<sub>Hsp</sub>* effect might be increased in presence of a homozygous wild  
564 *PPD-H1* allele, suggesting an interaction of these two. A previous study has already shown  
565 increased expression of *PPD-H1* in *elf3* mutants and effects on flowering time in *elf3* mutants  
566 by variation at *PPD-H1* under LD (Faure *et al.*, 2012). One approach to further study the  
567 interaction of *ELF3* with *PPD-H1* or *PIF4* is the development of double HIFs. Here, the  
568 concept is to detect a HEB line which is heterozygous at both loci of interest and select  
569 segregating offspring genotypes in all four possible combinations of wild and elite alleles at  
570 these two loci (i.e. *PPD-H1<sub>Hv</sub>/ELF3<sub>Hv</sub>*, *PPD-H1<sub>Hv</sub>/ELF3<sub>Hsp</sub>*, *PPD-H1<sub>Hsp</sub>/ELF3<sub>Hv</sub>*, *PPD-*  
571 *H1<sub>Hsp</sub>/ELF3<sub>Hsp</sub>*). Since the interaction of *ELF3* with other members of the evening complex or

572 the flowering time pathway is poorly understood in barley, another approach for further  
573 research could be an expression analysis of those genes in double HIFs.

574 Another HIF worth mentioning is 12\_001, because it is the only HIF for which the *ELF3<sub>Hsp</sub>*  
575 allele led to a later HEA of up to 2.5 days on average (Fig. 4). Besides, it is the HIF with the  
576 strongest *Hsp* effect for a lower TGW with up to 7 g less grain weight on average (Fig. 4). As  
577 already described above, the two HIF sister lines unexpectedly showed differently fixed  
578 homozygous alleles at *CEN* (Supplementary Table S11), which might explain why the HIF  
579 line carrying the *ELF3<sub>Hsp</sub>* allele in HIF 12\_001 showed a different effect direction for HEA  
580 (Fig. 4). Previous results showed that the *CEN<sub>Hsp</sub>* allele accelerates flowering (Maurer *et al.*,  
581 2016) and this effect could superimpose the *ELF3<sub>Hsp</sub>* effect, since the two HIF sister lines  
582 display opposite alleles at these loci. Furthermore, Casas *et al.* (2021) have shown interactions  
583 between *CEN* and *ELF3* in barley. Nonetheless, the decreasing effect of *ELF3<sub>Hsp</sub>* on TGW in  
584 HIF 12\_001 remains interesting, since neither *ELF3<sub>Hsp</sub>* nor *CEN<sub>Hsp</sub>* did show effects on TGW  
585 under standard conditions before (Maurer *et al.*, 2016). However, HIF 12\_001 still has  
586 12.00 % of the genome segregating between sister lines, which could also be the cause for  
587 these effects (Supplementary Table S12).

588 Yield performance of all HIFs was different between the two years. In 2020, it is striking that  
589 the absolute yield was far below average yields (Supplementary Table S14). Nevertheless,  
590 significant yield effects of *ELF3<sub>Hsp</sub>* alleles were found for HIFs 16\_105, 17\_041 and 25\_002  
591 BC2 with yield differences of up to 15.96 dt/ha in HIF 16\_105. This is tremendous  
592 considering the absolute yield and the average yield for spring barley in Germany (55.6 dt/ha  
593 in 2020 (Federal Ministry of Food and Agriculture, 2020)) and can be explained by the  
594 presence of different brittle rachis (*btr1/btr2*) alleles between HIF sister lines of 16\_105 and  
595 17\_041 (Supplementary Table S3), which affect the shattering of the ear at maturity. Thus,  
596 the observed significant yield effects are due to a differing number of harvested grains per ear  
597 and rather have to be attributed to a brittle rachis phenotype (Pourkheirandish *et al.*, 2015)  
598 than to the *ELF3* difference.

599 Increasing yield has always been the main goal in plant breeding. Domestication and selection  
600 of crop plants improved yield but this went along with loss of genetic diversity. Wild barleys  
601 provide a huge genetic resource that can be useful to extend the elite barley breeding pool to  
602 cope with challenges set by the ongoing climate change (Ellis *et al.*, 2000; Nevo, 2013;  
603 Tanksley and McCouch, 1997; Zamir, 2001). However, not only yield improving genotypes  
604 are of interest for future breeding programs, but also HIFs carrying exotic alleles for  
605 increasing biodiversity and improvement of other agronomic traits, provided that they are not

606 associated with a yield penalty. This assumption also applies to plant height, since larger  
607 plants increase the risk of lodging and yield losses (Hedden, 2003). In this regard, the  
608 *ELF3<sub>Hsp</sub>* carrying HIF lines 10\_190 and 12\_111 may be useful for breeding. The exotic alleles  
609 exhibited increasing effects on number of ears and number of grains per ear, respectively,  
610 without simultaneous negative effects on yield or plant height. If early heading is desired, the  
611 *ELF3<sub>Hsp</sub>* alleles present in HIF lines 03\_140, 10\_190 and 18\_062 are interesting, since they  
612 showed early heading without negative effects on yield or plant height.

### 613 *ELF3 effects in the context of environment*

614 Generally, more significant trait effects were found in 2020 than in 2019 (Fig. 4). One reason  
615 could be that larger plots and more replicates (6 in 2020 vs. 4 in 2019) are necessary to  
616 observe significant differences. Another reason could be that the *ELF3<sub>Hsp</sub>* effect is larger  
617 under specific environmental conditions, as shown before ((Herzig *et al.*, 2018), Fig. 1).  
618 Herzig *et al.* (2018) reported that *ELF3<sub>Hsp</sub>* effects on heading were stronger in Dundee (2014  
619 and 2015) with colder summers (up to 16 °C on average), more and equally distributed rain  
620 (>800 mm) and greater day lengths (maximum of 17.45 h) compared to Halle. In Halle the  
621 average temperature in July was up to 21 °C, 50 % of the annual precipitation (514 mm) fell  
622 during July and August and maximum day length was 16.63 h (Herzig *et al.*, 2018). In the  
623 present study, 2020 is characterised by a warmer vegetation period (on average 13.4 °C  
624 compared to 12.9 °C in 2019) except for the last month (on average 19.4 °C compared to  
625 21.3 °C in 2019) with daily average temperatures of up to 23.8 °C (compared with up to  
626 29 °C in 2019) and rain mainly at the end of the vegetation period instead of equally  
627 distributed rain as in 2019 (127 mm in both years during the vegetation period). Also, in  
628 2020, the photoperiod (the absolute amount of day light over the whole vegetation period)  
629 was higher compared to 2019.

630 As part of the circadian clock, controlling plant development based on day length and ambient  
631 temperature signals (Bendix *et al.*, 2015; Calixto *et al.*, 2015; Harmer, 2009; Nusinow *et al.*,  
632 2011; Wijnen and Young, 2006), *ELF3* very likely plays a role in adaptation to environmental  
633 changes in barley. In Arabidopsis, the circadian clock is a major regulator of the response to  
634 abiotic stress (reviewed in Habte *et al.* (2014)). *ELF3*, as a part of the circadian clock, might  
635 influence this as well in barley, as shown in Saade *et al.* (2016), where *ELF3<sub>Hsp</sub>* effects were  
636 increased under salinity stress (for HEA, TGW and HEI). *AtELF3* also controls growth in  
637 response to ambient temperature and photoperiod (Anwer *et al.*, 2020; Box *et al.*, 2015; Jung  
638 *et al.*, 2020; Raschke *et al.*, 2015; Thines and Harmon, 2010; Zhu *et al.*, 2021). It was

639 suggested to support crop improvement under higher temperature (Zhu *et al.*, 2021). For  
640 barley, Ejaz and von Korff (2017) could show that a non-functional *elf3* leads to earlier  
641 flowering under high ambient temperature, whereas a functional *ELF3* leads to later  
642 flowering. Also, no reduction in floret and seed number was observed under high ambient  
643 temperature for a non-functional *elf3* compared to a functional *ELF3* allele.  
644 Hence, we conclude that the environment in 2019 led to weaker effect differences, which  
645 could be caused by temperature, precipitation and/or photoperiod effects. Therefore, a further  
646 experiment under controlled greenhouse conditions was conducted.

#### 647 *Image-based phenotyping in controlled environments validates results from field trials*

648 To confirm the results from the field experiments in a different but typical experimental  
649 condition, HIF pair 10\_190 was selected for a greenhouse experiment (LD: 16 h light, 8 h  
650 darkness, day/night temperatures of 20 °C/18 °C) and compared to cultivar Bowman and the  
651 two *elf3* mutant lines BW289 and BW290. The latter were generated in a Bowman  
652 background, exhibiting early flowering phenotypes (Ejaz and von Korff, 2017; Faure *et al.*,  
653 2012; Zakhrebekova *et al.*, 2012). HIF pair 10\_190 was selected because it a) exhibited the  
654 strongest effects, especially for SHO and HEA in both years in the field experiments (Fig. 4),  
655 b) it was an interesting HIF regarding the similarity between the wild and cultivated *ELF3*  
656 protein sequences (Fig. 2C) and c) showed a low amount of additional segregating regions  
657 (Supplementary Table S12).

658 The way of phenotyping the traits heading, tiller number and plant height was slightly  
659 different compared to the field trials. Here, heading was scored when the first awns of a plant  
660 appeared, which is well comparable with HEA in the field trials, where it was scored, when  
661 the awns were visible for 50 % of all plants of a plot. In the greenhouse, number of tillers was  
662 counted manually on day 64 and all tillers were included, while in the field trials the trait  
663 EAR was counted by using a representative 50 cm frame in the centre of a plot and only tillers  
664 already carrying ears were counted. Plant height in the greenhouse was measured  
665 continuously and was obtained by analysing images and in the field trial it was solely  
666 measured at the end of maturity with tillers pulled upright.

667 As expected, the mutants showed earlier flowering of about 24 days compared to Bowman  
668 (Fig. 5A). For the HIF pair, the line with the wild *ELF3<sub>Hsp</sub>* allele flowered about 18 days  
669 earlier than the line carrying the *ELF3<sub>Hv</sub>* allele, even outperforming the results of the field  
670 experiments and the previous QTL studies.



671

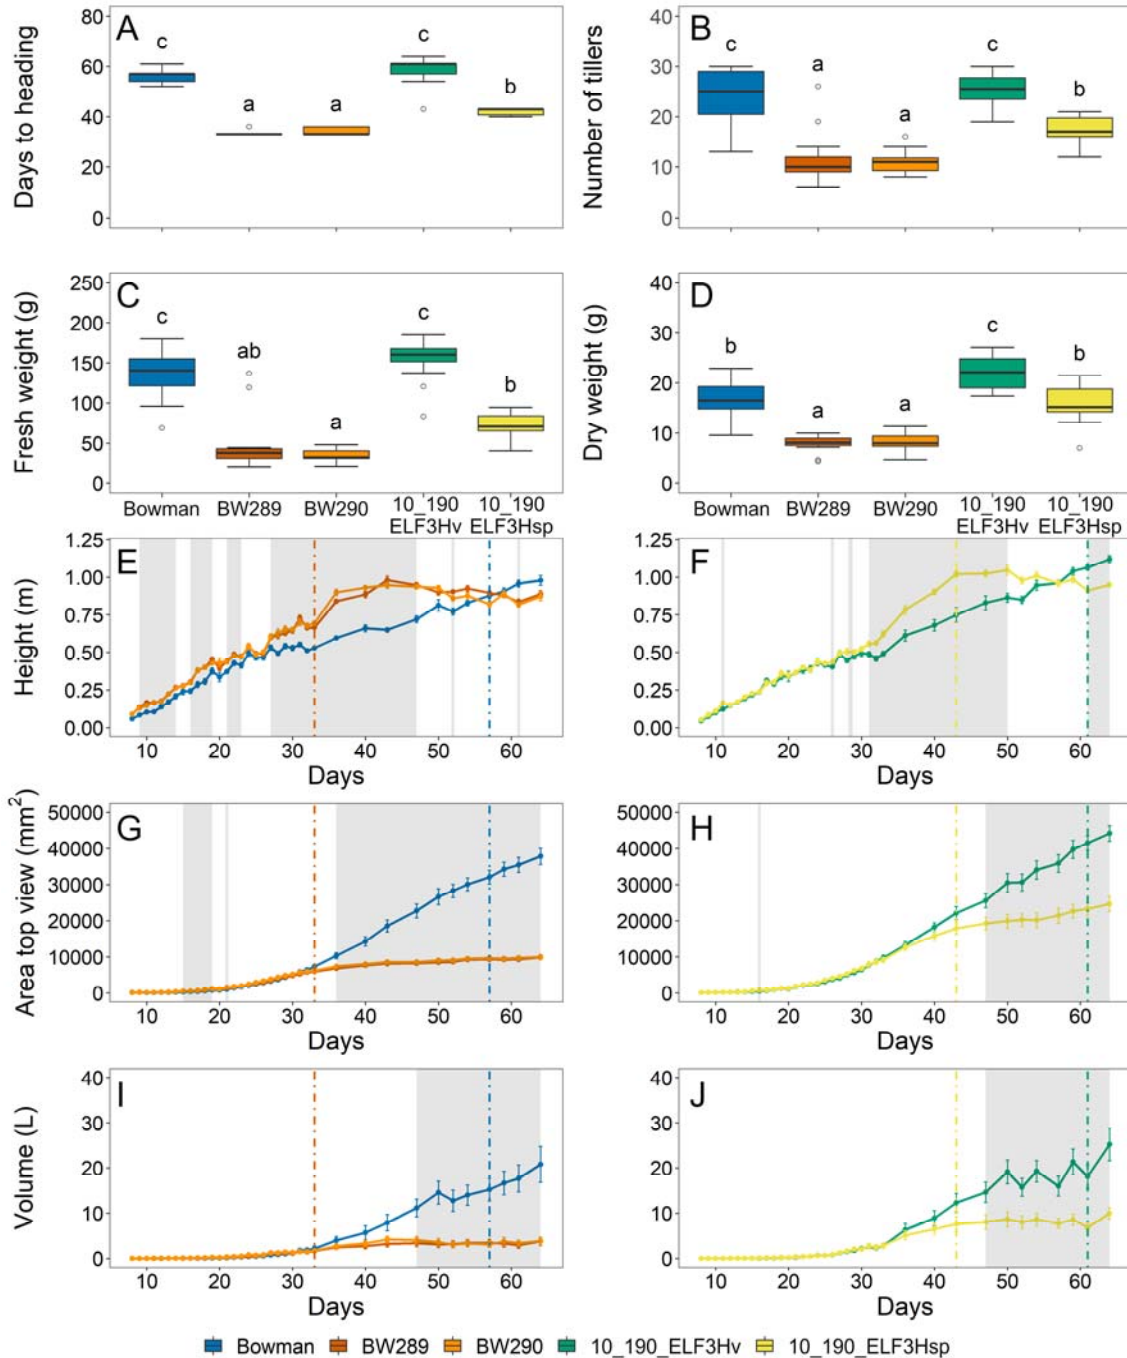

672

673 **Fig. 5** Growth and biomass parameters for cultivar Bowman, two *elf3* mutants in Bowman  
 674 background, BW289 and BW290, and HIF pair 10\_190. Plants were grown under standard  
 675 greenhouse conditions (LD with 20/18°C day/night temperatures). Heading (A) was scored  
 676 from images when the awn tips of the first awn were visible. Number of tillers (B), fresh  
 677 weight (C) and dry weight (D) were measured at the end of the experiment (day 64). Boxplots  
 678 (A-D) show medians and interquartile ranges (IQR) and outliers were defined as 1.5 x IQR.  
 679 Different letters above boxes indicate significant differences (one-way ANOVA with Tukey's  
 680 HSD test,  $p < 0.05$ ). Parameters height, area and volume (E-J) were extracted from the  
 681 Integrated Analysis Platform (IAP) pipeline (Klukas *et al.*, 2014). Coloured vertical lines  
 682 show the mean flowering time of the respective genotype and grey shaded areas show

683 significant differences for Bowman with both mutants (E,G,I) and between sisters lines of  
684 HIF 10\_190 (F,H,J) (one-way ANOVA with Tukey's HSD test,  $p < 0.05$ ). Error bars indicate  
685 standard error of mean (SEM) across  $\geq 13$  biological replicates.

686

687 To evaluate whether barley *ELF3* had an impact in controlling vegetative growth, the three  
688 growth parameters plant height, area and volume were measured or estimated (for volume)  
689 (Fig. 5E-J). Plant height showed an increase just before heading for both mutants and  
690 10\_190\_*ELF3*<sub>Hsp</sub>, which could be related to the trait SHO from the field experiment where  
691 10\_190\_*ELF3*<sub>Hsp</sub> showed early shooting (Fig. 4). Just after heading, the growth curve  
692 flattened for the mutants (day 33) and 10\_190\_*ELF3*<sub>Hsp</sub> (day 43), while growth of cultivar  
693 Bowman and 10\_190\_*ELF3*<sub>Hv</sub> continued to increase. At this point it should be noted, that  
694 Bowman shows the same phenotype as 10\_190\_*ELF3*<sub>Hv</sub> although it shares the W669G  
695 substitution as 10\_190\_*ELF3*<sub>Hsp</sub>. This again indicates the presence of further factors  
696 determining the *ELF3*<sub>Hsp</sub> allele effect differences, like further amino acid differences between  
697 *ELF3* proteins and differences in the remaining genome as already discussed. The same trend  
698 as for plant height was visible for plant area and plant volume (Fig. 5G-J) where the growth  
699 curve flattened for the mutants and 10\_190\_*ELF3*<sub>Hsp</sub> directly after heading, whereas for  
700 Bowman and 10\_190\_*ELF3*<sub>Hv</sub> growth strongly increased at the same time. These results  
701 confirm a reduced vegetative growth rate for BW289, BW290 and the wild barley  
702 10\_190\_*ELF3*<sub>Hsp</sub> allele. This is in accordance with the findings that BW289, BW290 and  
703 10\_190\_*ELF3*<sub>Hsp</sub> showed less tillers and less fresh and dry weight compared to cultivar  
704 Bowman and 10\_190\_*ELF3*<sub>Hv</sub> (Fig. 5B-D). This can also be explained by early heading and a  
705 shortened growth period (Fig. 5A). In the field experiment, no plant height effect was  
706 observed between sister lines of HIF 10\_190 (Fig. 4). This may be explained by the fact that  
707 plant height in the field was measured at the end of maturity rather than during development.  
708 Strikingly, in the field experiment 2020, the *ELF3*<sub>Hsp</sub> carrying HIF 10\_190 line had more ears  
709 per square meter compared to the *ELF3*<sub>Hv</sub> carrying line. This effect could not be validated in  
710 the greenhouse experiment. A reason could be that for the greenhouse plants, all tillers were  
711 counted without considering if tillers would develop into a spike, whereas in the field  
712 experiments only developed ears were counted. In conclusion, the greenhouse results for  
713 10\_190 were able to confirm most of the results from the field trials, in particular for heading.

714

715

## 716 **Conclusions**

717 In this study, we validated QTL effects from previous barley field studies that were attributed  
718 to a genomic region that included *ELF3* (Herzig *et al.*, 2018; Maurer *et al.*, 2015; Maurer *et*  
719 *al.*, 2016). We made use of nearly isogenic barley HIF pairs that segregated for the *ELF3*  
720 gene. The HIF pairs confirmed variation between *ELF3* alleles and genotype by environment  
721 interaction across the studied years. The effects can be attributed to variation of *ELF3* protein  
722 sequence in context of the genomic background. For instance, a possible interaction between  
723 *ELF3* and *Ppd-H1* or *PIF4* was suggested as a reason for observed differences of plant  
724 development between HIF pairs. Due to the central role of *ELF3* in the circadian clock with  
725 manifold protein interactions, in future experiments additional HIFs differing in the genomic  
726 background should be selected and characterized to shed further light on the control of plant  
727 development by interacting substitutions at critical amino acid positions of the *ELF3* protein.  
728 As an alternative route of explaining significant effects between segregating HIF pairs, one  
729 has to consider sequence variations between the *Hsp* and *Hv* promoters of *ELF3*. A study of  
730 *ELF3* promoter effects in the HIF lines may be possible based on our running HAPPAN pan  
731 genome sequencing effort with the 25 wild barley donors of HEB-25  
732 (<https://gepris.dfg.de/gepris/projekt/433162815>).

733 A greenhouse experiment confirmed the major results of the field trials. HIF pair 10\_190 was  
734 especially promising, showing strong effects without yield losses in the field experiment and  
735 even stronger effects in the greenhouse. These trait differences may be explained by the  
736 substitution of a single amino acid, which was shown to influence *ELF3* protein structure and  
737 thereby directly affecting the properties underlying nano-compartment formation of *ELF3* and  
738 possibly also affecting its interaction partners inside the cell.

739 Ultimately, this study confirmed that HIFs can be a useful tool to characterize and validate  
740 allelic effects from previous QTL studies. We have shown that the selection of HIFs with a  
741 fixed genomic background is crucial to obtain significant results. Furthermore, we propose  
742 double HIFs, simultaneously segregating at two loci, as a valuable option to investigate  
743 epistatic effects or dependencies between interacting genes. The identification of promising  
744 *ELF3* alleles for improvement of developmental and yield-related traits in barley is important  
745 for barley breeding, especially for adaptation of elite barley to climate change related stresses.  
746

## 747 **Supplementary data**

748

749 *Table S1.* IBD Genotype data from the Infinium iSelect 50k SNP chip of preselected BC<sub>1</sub>S<sub>3:8</sub>  
750 lines with a heterozygous ELF3 locus.

751 *Table S2.* Markers used for selection of HIF sister lines.

752 *Table S3.* IBD Genotype data from the Infinium iSelect 50k SNP chip of all HIFs used in the  
753 field trial (with a homozygous ELF3 locus).

754 *Table S4.* Repeatabilities (Rep) and heritabilities (H<sup>2</sup>).

755 *Table S5.* Primers used for PCR and sequencing of ELF3 coding sequence.

756 *Table S6.* Coding sequences of all 25 wild donors of HEB-25, Barke, Bowman and BW290.

757 *Table S7.* Protein sequences of all 25 wild donors of HEB-25, Barke, Bowman, BW290 and  
758 Morex.

759 *Table S8.* Variation in amino acids of all 25 wild donors of HEB-25, Barke, Bowman, BW290  
760 and Morex.

761 *Table S9.* Data from the local sequence analysis, including the identified pdb file, chain,  
762 residue range and occurrence of secondary structure elements.

763 *Table S10.* Accession codes for the barley homologues and the disorder content prediction.

764 *Table S11.* IBD Genotype data from the Infinium iSelect 50k SNP chip of all HIFs for the  
765 eight major flowering time loci.

766 *Table S12.* Segregation of HIF sister lines in basepairs and in % of whole barley genome of  
767 5.1 Gbp including the ELF3 region.

768 *Table S13.* IBD Genotype data from the Infinium iSelect 50k SNP chip of a selection of genes  
769 that are also important for flowering time control in barley.

770 *Table S14.* Raw data and BLUEs of all investigated traits with significant differences between  
771 HIF sister lines.

772 *Table S15.* Descriptive statistics of all investigated traits based on best linear unbiased  
773 estimates (BLUEs) for both years separately.

774 *Table S16.* ANOVA results of phenotypic data for genotype, year and genotype×year  
775 interactions.

776 *Table S17.* Descriptive statistics for each HIF sister line per year.

777 *Table S18.* Genes in segregating regions of line 10\_190 extracted from Barlex (IPK  
778 Gatersleben).

779

780

781 *Fig. S1.* Weather data.

782 *Fig. S2.* Segregating regions between HIF sister lines.

783 *Fig. S3.* Boxplots for all traits and both years separately.

784 *Fig. S4.* Correlations of traits for 2019 and 2020 separately.

785

786 *Note S1.* Repeatabilities and heritabilities. Correlations.

787

## 788 **Acknowledgements**

789 This work was funded by the European Social Fund (ESF) through the AGRIPOLY Graduate  
790 School “*Determinants of Plant Performance*” (project leaders: KP and MQ). We want to  
791 thank Steve Babben for his help in sequencing. We are also grateful to Roswitha Ende, Jana  
792 Müglitz, Markus Hinz and various students for technical assistance in the field experiments.  
793 Furthermore, we want to thank TraitGenetics GmbH, Gatersleben, Germany, for genotyping  
794 HIF sister lines with KASP markers and with the barley Infinium iSelect 50k SNP chip. We  
795 also want to thank the Leibniz Institute of Plant Genetics and Crop Plant Research (IPK),  
796 Gatersleben, Germany, for the possibility to conduct an image-based phenotyping experiment  
797 and especially Ingo Mücke, Annett Busching, Gunda Wehrstedt, Marie Cheyenne Hellmann  
798 and Heiko Kriegel for their support with the experiment. PLK thanks the Federal Ministry for  
799 Education and Research (BMBF, ZIK program) (Grant nos. 03Z22HN23, 03Z22HI2 and  
800 03COV04 to PLK), the European Regional Development Funds for Saxony-Anhalt (grant no.  
801 EFRE: ZS/2016/04/78115 to PLK), the Deutsche Forschungsgemeinschaft (DFG) (project  
802 number 391498659 and RTG 2467), and the Martin Luther University of Halle-Wittenberg.

803

## 804 **Author contributions**

805 KP, MQ and AM conceived the project and planned the experiments. TZ analysed all data  
806 and performed the experiment in 2019. JK and NR performed the experiment in 2020. ZZ  
807 generated *ELF3* gene sequences, derived *ELF3* protein sequences and conceived the image-  
808 based phenotyping experiment, which was conducted by AJ and TA. TS analysed *ELF3* gene  
809 sequences and provided additional barley genome resources. CT and PLK performed *ELF3*  
810 protein sequence and structure analysis. TZ, ZZ, CT, MQ, KP and AM wrote the manuscript.

811

## 812 **Conflicts of interest**

813 The authors declare that the research was conducted in the absence of any commercial or  
814 financial relationships that could be construed as a potential conflict of interest.

## 815 **Funding**

816 This work was funded by the European Social Fund (ESF) through the AGRIPOLY Graduate  
817 School “Determinants of Plant Performance” (project leaders: KP and MQ). Further funding  
818 for protein structure analysis was acquired by PLK from the Federal Ministry for Education  
819 and Research (BMBF, ZIK program) (Grant nos. 03Z22HN23, 03Z22HI2 and 03COV04), the  
820 European Regional Development Funds for Saxony-Anhalt (grant no. EFRE:  
821 ZS/2016/04/78115) and Deutsche Forschungsgemeinschaft (DFG) (project numbers  
822 391498659 and RTG 2467).

823

## 824 **Data availability**

825 All relevant data are included in the supplementary files. Protein sequence/structure analysis  
826 scripts can be made available upon request.

## **References**

- Andres F, Coupland G.** 2012. The genetic basis of flowering responses to seasonal cues. *Nature Review Genetics* 13, 627-639.
- Anwer MU, Davis A, Davis SJ, Quint M.** 2020. Photoperiod sensing of the circadian clock is controlled by EARLY FLOWERING 3 and GIGANTEA. *Plant Journal* 101, 1397-1410.
- Bayer MM, Rapazote-Flores P, Ganai M, et al.** 2017. Development and Evaluation of a Barley 50k iSelect SNP Array. *Frontiers in Plant Science* 8, 1792.
- Bendix C, Marshall CM, Harmon FG.** 2015. Circadian Clock Genes Universally Control Key Agricultural Traits. *Molecular Plant* 8, 1135-1152.
- Bergelson J, Roux F.** 2010. Towards identifying genes underlying ecologically relevant traits in *Arabidopsis thaliana*. *Nature Review Genetics* 11, 867-879.
- Bhatla N.** 2012. Exon-Intron Graphic Maker. <http://wormweb.org/exonintron>. Accessed November 2021.
- Blum M, Chang HY, Chuguransky S, et al.** 2021. The InterPro protein families and domains database: 20 years on. *Nucleic Acids Research* 49, D344-D354.
- Blümel M, Dally N, Jung C.** 2015. Flowering time regulation in crops-what did we learn from *Arabidopsis*? *Current Opinion in Biotechnology* 32, 121-129.
- Boden SA, Weiss D, Ross JJ, Davies NW, Trevaskis B, Chandler PM, Swain SM.** 2014. EARLY FLOWERING3 Regulates Flowering in Spring Barley by Mediating Gibberellin Production and FLOWERING LOCUS T Expression. *Plant Cell* 26, 1557-1569.
- Box MS, Huang BE, Domijan M, et al.** 2015. ELF3 controls thermoresponsive growth in *Arabidopsis*. *Current Biology* 25, 194-199.
- Calixto CP, Waugh R, Brown JW.** 2015. Evolutionary relationships among barley and *Arabidopsis* core circadian clock and clock-associated genes. *Journal of Molecular Evolution* 80, 108-119.
- Campoli C, Drosse B, Searle I, Coupland G, von Korff M.** 2012a. Functional characterisation of HvCO1, the barley (*Hordeum vulgare*) flowering time ortholog of CONSTANS. *Plant Journal* 69, 868-880.

- Campoli C, Shtaya M, Davis SJ, von Korff M.** 2012b. Expression conservation within the circadian clock of a monocot: natural variation at barley Ppd-H1 affects circadian expression of flowering time genes, but not clock orthologs. *BMC Plant Biology* 12, 97.
- Campoli C, von Korff M.** 2014. Genetic Control of Reproductive Development in Temperate Cereals. *Advances in Botanical Research* 72, 131-158.
- Casas AM, Gazulla CR, Monteagudo A, et al.** 2021. Candidate genes underlying QTL for flowering time and their interactions in a wide spring barley (*Hordeum vulgare* L.) cross. *The Crop Journal* 9, 862–872.
- Challinor AJ, Watson J, Lobell DB, Howden SM, Smith DR, Chhetri N.** 2014. A meta-analysis of crop yield under climate change and adaptation. *Nature Climate Change* 4, 287-291.
- Cockram J, Jones H, Leigh FJ, O'Sullivan D, Powell W, Laurie DA, Greenland AJ.** 2007. Control of flowering time in temperate cereals: genes, domestication, and sustainable productivity. *Journal of Experimental Botany* 58, 1231-1244.
- Comadran J, Kilian B, Russell J, et al.** 2012. Natural variation in a homolog of *Antirrhinum CENTRORADIALIS* contributed to spring growth habit and environmental adaptation in cultivated barley. *Nature Genetics* 44, 1388-1392.
- Crooks GE, Hon G, Chandonia JM, Brenner SE.** 2004. WebLogo: a sequence logo generator. *Genome Research* 14, 1188-1190.
- Deng W, Casao MC, Wang P, Sato K, Hayes PM, Finnegan EJ, Trevaskis B.** 2015. Direct links between the vernalization response and other key traits of cereal crops. *Nature Communications* 6, 5882.
- Dixon LE, Knox K, Kozma-Bognar L, Southern MM, Pokhilko A, Millar AJ.** 2011. Temporal repression of core circadian genes is mediated through EARLY FLOWERING 3 in *Arabidopsis*. *Current Biology* 21, 120-125.
- Ejaz M, von Korff M.** 2017. The Genetic Control of Reproductive Development under High Ambient Temperature. *Plant Physiology* 173, 294-306.
- Ellis RP, Forster BP, Robinson D, Handley LL, Gordon DC, Russell JR, Powell W.** 2000. Wild barley: a source of genes for crop improvement in the 21st century? *Journal of Experimental Botany* 51, 9-17.
- FAOSTAT.** 2009. High Level Expert Forum - How to feed the world 2050.
- Faure S, Turner AS, Gruszka D, Christodoulou V, Davis SJ, von Korff M, Laurie DA.** 2012. Mutation at the circadian clock gene EARLY MATURITY 8 adapts domesticated barley (*Hordeum vulgare*) to short growing seasons. *Proceedings of the National Academy of Sciences of the United States of America* 109, 8328-8333.
- Federal Ministry of Food and Agriculture.** 2020. Erntebericht 2020 - Mengen und Preise.
- Fernandez-Calleja M, Casas AM, Igartua E.** 2021. Major flowering time genes of barley: allelic diversity, effects, and comparison with wheat. *Theoretical and Applied Genetics* 134, 1867-1897.
- Franklin KA, Lee SH, Patel D, et al.** 2011. Phytochrome-interacting factor 4 (PIF4) regulates auxin biosynthesis at high temperature. *Proceedings of the National Academy of Sciences of the United States of America* 108, 20231-20235.
- Gabler F, Nam SZ, Till S, Mirdita M, Steinegger M, Soding J, Lupas AN, Alva V.** 2020. Protein Sequence Analysis Using the MPI Bioinformatics Toolkit. *Current Protocols in Bioinformatics* 72, e108.
- Gangappa SN, Berriri S, Kumar SV.** 2017. PIF4 Coordinates Thermosensory Growth and Immunity in *Arabidopsis*. *Current Biology* 27, 243-249.
- Gasteiger E, Gattiker A, Hoogland C, Ivanyi I, Appel RD, Bairoch A.** 2003. ExPASy: The proteomics server for in-depth protein knowledge and analysis. *Nucleic Acids Research* 31, 3784-3788.

- Habte E, Muller LM, Shtaya M, Davis SJ, von Korff M.** 2014. Osmotic stress at the barley root affects expression of circadian clock genes in the shoot. *Plant Cell Environment* 37, 1321-1327.
- Harmer SL.** 2009. The circadian system in higher plants. *Annual Review of Plant Biology* 60, 357-377.
- Hedden P.** 2003. The genes of the Green Revolution. *Trends in Genetics* 19, 5-9.
- Hemming MN, Peacock WJ, Dennis ES, Trevaskis B.** 2008. Low-temperature and daylength cues are integrated to regulate FLOWERING LOCUS T in barley. *Plant Physiology* 147, 355-366.
- Herrero E, Kolmos E, Bujdoso N, et al.** 2012. EARLY FLOWERING4 recruitment of EARLY FLOWERING3 in the nucleus sustains the Arabidopsis circadian clock. *Plant Cell* 24, 428-443.
- Herzig P, Backhaus A, Seiffert U, von Wiren N, Pillen K, Maurer A.** 2019. Genetic dissection of grain elements predicted by hyperspectral imaging associated with yield-related traits in a wild barley NAM population. *Plant Science* 285, 151-164.
- Herzig P, Maurer A, Draba V, et al.** 2018. Contrasting genetic regulation of plant development in wild barley grown in two European environments revealed by nested association mapping. *Journal of Experimental Botany* 69, 1517-1531.
- Hicks KA, Albertson TM, Wagner DR.** 2001. EARLY FLOWERING3 encodes a novel protein that regulates circadian clock function and flowering in Arabidopsis. *Plant Cell* 13, 1281-1292.
- Huang H, Alvarez S, Bindbeutel R, et al.** 2016. Identification of Evening Complex Associated Proteins in Arabidopsis by Affinity Purification and Mass Spectrometry. *Molecular & Cellular Proteomics* 15, 201-217.
- Huang H, Gehan MA, Huss SE, et al.** 2017. Cross-species complementation reveals conserved functions for EARLY FLOWERING 3 between monocots and dicots. *Plant Direct* 1, e00018.
- Huang H, Nusinow DA.** 2016. Into the Evening: Complex Interactions in the Arabidopsis Circadian Clock. *Trends in Genetics* 32, 674-686.
- JCBN I-IJCoBN.** 1984. Nomenclature and symbolism for amino acids and peptides. Recommendations 1983. *European Journal of Biochemistry* 138, 9-37.
- Jumper J, Evans R, Pritzel A, et al.** 2021. Highly accurate protein structure prediction with AlphaFold. *Nature* 596, 583-589.
- Jung JH, Barbosa AD, Hutin S, et al.** 2020. A prion-like domain in ELF3 functions as a thermosensor in Arabidopsis. *Nature* 585, 256-260.
- Katoh K, Rozewicki J, Yamada KD.** 2019. MAFFT online service: multiple sequence alignment, interactive sequence choice and visualization. *Briefings in Bioinformatics* 20, 1160-1166.
- Kim DH, Han KH.** 2018. Transient Secondary Structures as General Target-Binding Motifs in Intrinsically Disordered Proteins. *International Journal of Molecular Sciences* 19.
- Klukas C, Chen D, Pape JM.** 2014. Integrated Analysis Platform: An Open-Source Information System for High-Throughput Plant Phenotyping. *Plant Physiology* 165, 506-518.
- Koini MA, Alvey L, Allen T, Tilley CA, Harberd NP, Whitelam GC, Franklin KA.** 2009. High temperature-mediated adaptations in plant architecture require the bHLH transcription factor PIF4. *Current Biology* 19, 408-413.
- Kumar SV, Lucyshyn D, Jaeger KE, Alos E, Alvey E, Harberd NP, Wigge PA.** 2012. Transcription factor PIF4 controls the thermosensory activation of flowering. *Nature* 484, 242-245.
- Kuraku S, Zmasek CM, Nishimura O, Katoh K.** 2013. aLeaves facilitates on-demand exploration of metazoan gene family trees on MAFFT sequence alignment server with enhanced interactivity. *Nucleic Acids Research* 41, W22-28.



- Lancashire PD, Bleiholder H, Vandenboom T, Langeluddeke P, Stauss R, Weber E, Witzemberger A.** 1991. A Uniform Decimal Code for Growth-Stages of Crops and Weeds. *Annals of Applied Biology* 119, 561-601.
- Liu XL, Covington MF, Fankhauser C, Chory J, Wagner DR.** 2001. ELF3 encodes a circadian clock-regulated nuclear protein that functions in an Arabidopsis PHYB signal transduction pathway. *Plant Cell* 13, 1293-1304.
- Majumdar A, Dogra P, Maity S, Mukhopadhyay S.** 2019. Liquid-Liquid Phase Separation Is Driven by Large-Scale Conformational Unwinding and Fluctuations of Intrinsically Disordered Protein Molecules. *Journal of Physical Chemistry Letters* 10, 3929-3936.
- Maurer A, Draba V, Jiang Y, Schnaithmann F, Sharma R, Schumann E, Kilian B, Reif JC, Pillen K.** 2015. Modelling the genetic architecture of flowering time control in barley through nested association mapping. *BMC Genomics* 16, 290.
- Maurer A, Draba V, Pillen K.** 2016. Genomic dissection of plant development and its impact on thousand grain weight in barley through nested association mapping. *Journal of Experimental Botany* 67, 2507-2518.
- Maurer A, Pillen K.** 2019. 50k Illumina Infinium iSelect SNP Array data for the wild barley NAM population HEB-25. doi: 10.5447/ipk/2019/20.
- Maurer A, Sannemann W, Leon J, Pillen K.** 2017. Estimating parent-specific QTL effects through cumulating linked identity-by-state SNP effects in multiparental populations. *Heredity* 118, 477-485.
- McMaster GS, Wilhelm WW.** 1997. Growing degree-days: one equation, two interpretations *Agricultural and Forest Meteorology* 87, 291-300.
- Minor DL, Jr., Kim PS.** 1994. Measurement of the beta-sheet-forming propensities of amino acids. *Nature* 367, 660-663.
- Monat C, Padmarasu S, Lux T, et al.** 2019. TRITEX: chromosome-scale sequence assembly of Triticeae genomes with open-source tools. *Genome Biology* 20, 284.
- Müller LM, Mombaerts L, Pankin A, Davis SJ, Webb AAR, Goncalves J, von Korff M.** 2020. Differential Effects of Day/Night Cues and the Circadian Clock on the Barley Transcriptome. *Plant Physiology* 183, 765-779.
- Necci M, Piovesan D, Dosztanyi Z, Tosatto SCE.** 2017. MobiDB-lite: fast and highly specific consensus prediction of intrinsic disorder in proteins. *Bioinformatics* 33, 1402-1404.
- Nevo E.** 2013. *Evolution of Wild Barley and Barley Improvement*. Dordrecht: Springer Netherlands, 1-23.
- Nieto C, Lopez-Salmeron V, Daviere JM, Prat S.** 2015. ELF3-PIF4 interaction regulates plant growth independently of the Evening Complex. *Current Biology* 25, 187-193.
- Nusinow DA, Helfer A, Hamilton EE, King JJ, Imaizumi T, Schultz TF, Farre EM, Kay SA.** 2011. The ELF4-ELF3-LUX complex links the circadian clock to diurnal control of hypocotyl growth. *Nature* 475, 398-402.
- Quint M, Delker C, Franklin KA, Wigge PA, Halliday KJ, van Zanten M.** 2016. Molecular and genetic control of plant thermomorphogenesis. *Nature Plants* 2, 15190.
- Raschke A, Ibanez C, Ullrich KK, et al.** 2015. Natural variants of ELF3 affect thermomorphogenesis by transcriptionally modulating PIF4-dependent auxin response genes. *BMC Plant Biology* 15, 197.
- Saade S, Maurer A, Shahid M, Oakey H, Schmockel SM, Negrao S, Pillen K, Tester M.** 2016. Yield-related salinity tolerance traits identified in a nested association mapping (NAM) population of wild barley. *Scientific Reports* 6, 32586.
- Semagn K, Babu R, Hearne S, Olsen M.** 2014. Single nucleotide polymorphism genotyping using Kompetitive Allele Specific PCR (KASP): overview of the technology and its application in crop improvement. *Molecular Breeding* 33.
- Smith CK, Withka JM, Regan L.** 1994. A thermodynamic scale for the beta-sheet forming tendencies of the amino acids. *Biochemistry* 33, 5510-5517.

- Szklarczyk D, Gable AL, Nastou KC, et al.** 2021. The STRING database in 2021: customizable protein-protein networks, and functional characterization of user-uploaded gene/measurement sets. *Nucleic Acids Research* 49, D605-D612.
- Tanksley SD, McCouch SR.** 1997. Seed banks and molecular maps: unlocking genetic potential from the wild. *Science* 277, 1063-1066.
- The Arabidopsis Information Resource (TAIR).**  
<https://www.arabidopsis.org/servlets/TairObject?type=locus&name=at2g25930>. Accessed November 29, 2021.
- Thines B, Harmon FG.** 2010. Ambient temperature response establishes ELF3 as a required component of the core Arabidopsis circadian clock. *Proceedings of the National Academy of Sciences of the United States of America* 107, 3257-3262.
- Tuinstra MR, Ejeta G, Goldsbrough PB.** 1997. Heterogeneous inbred family (HIF) analysis: a method for developing near-isogenic lines that differ at quantitative trait loci. *Theoretical and Applied Genetics* 95, 1005—1011.
- Turner A, Beales J, Faure S, Dunford RP, Laurie DA.** 2005. The pseudo-response regulator Ppd-H1 provides adaptation to photoperiod in barley. *Science* 310, 1031-1034.
- Vernon RM, Chong PA, Tsang B, Kim TH, Bah A, Farber P, Lin H, Forman-Kay JD.** 2018. Pi-Pi contacts are an overlooked protein feature relevant to phase separation. *Elife* 7.
- von Zitzewitz J, Szucs P, Dubcovsky J, et al.** 2005. Molecular and structural characterization of barley vernalization genes. *Plant Molecular Biology* 59, 449-467.
- Wiegmann M, Maurer A, Pham A, et al.** 2019. Barley yield formation under abiotic stress depends on the interplay between flowering time genes and environmental cues. *Scientific Reports* 9, 6397.
- Wijnen H, Young MW.** 2006. Interplay of circadian clocks and metabolic rhythms. *Annual Review of Genetics* 40, 409-448.
- Yan L, Fu D, Li C, et al.** 2006. The wheat and barley vernalization gene VRN3 is an orthologue of FT. *Proceedings of the National Academy of Sciences of the United States of America* 103, 19581-19586.
- Yan L, Loukoianov A, Blechl A, Tranquilli G, Ramakrishna W, SanMiguel P, Bennetzen JL, Echenique V, Dubcovsky J.** 2004. The wheat VRN2 gene is a flowering repressor down-regulated by vernalization. *Science* 303, 1640-1644.
- Yan L, Loukoianov A, Tranquilli G, Helguera M, Fahima T, Dubcovsky J.** 2003. Positional cloning of the wheat vernalization gene VRN1. *Proceedings of the National Academy of Sciences of the United States of America* 100, 6263-6268.
- Yu JW, Rubio V, Lee NY, et al.** 2008. COP1 and ELF3 control circadian function and photoperiodic flowering by regulating GI stability. *Molecular Cell* 32, 617-630.
- Zagotta MT, Hicks KA, Jacobs CI, Young JC, Hangarter RP, Meeks-Wagner DR.** 1996. The Arabidopsis ELF3 gene regulates vegetative photomorphogenesis and the photoperiodic induction of flowering. *Plant Journal* 10, 691-702.
- Zakhrabekova S, Gough SP, Braumann I, et al.** 2012. Induced mutations in circadian clock regulator Mat-a facilitated short-season adaptation and range extension in cultivated barley. *Proceedings of the National Academy of Sciences of the United States of America* 109, 4326-4331.
- Zamir D.** 2001. Improving plant breeding with exotic genetic libraries. *Nature Review Genetics* 2, 983-989.
- Zhu Z, Quint M, Anwer MU.** 2021. Early Flowering 3 controls temperature responsiveness of the circadian clock independently of the evening complex. *Journal of Experimental Botany* 10.1093/jxb/erab473.

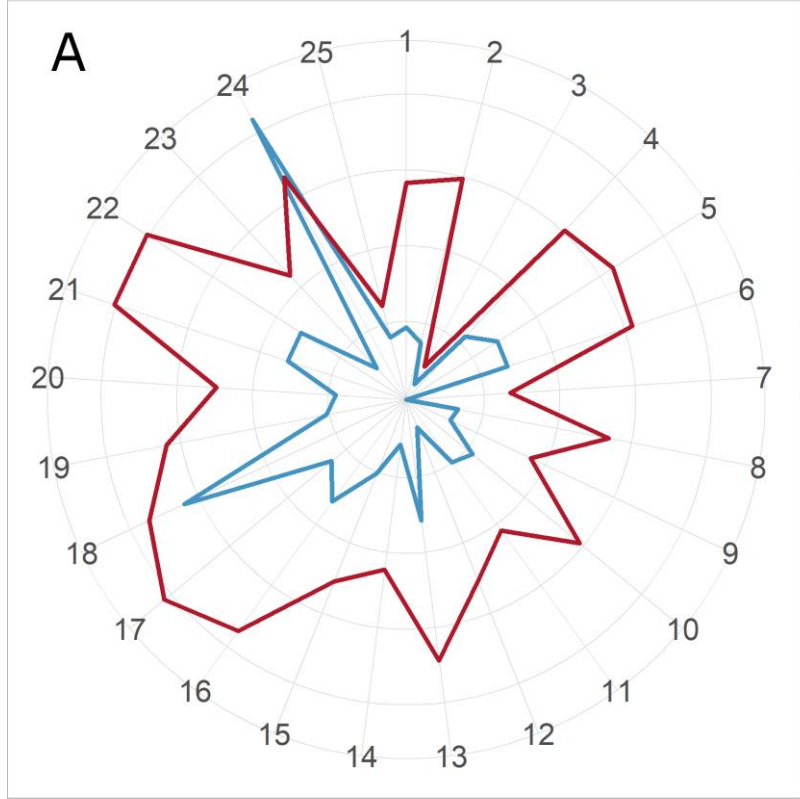

□ Dundee □ Halle

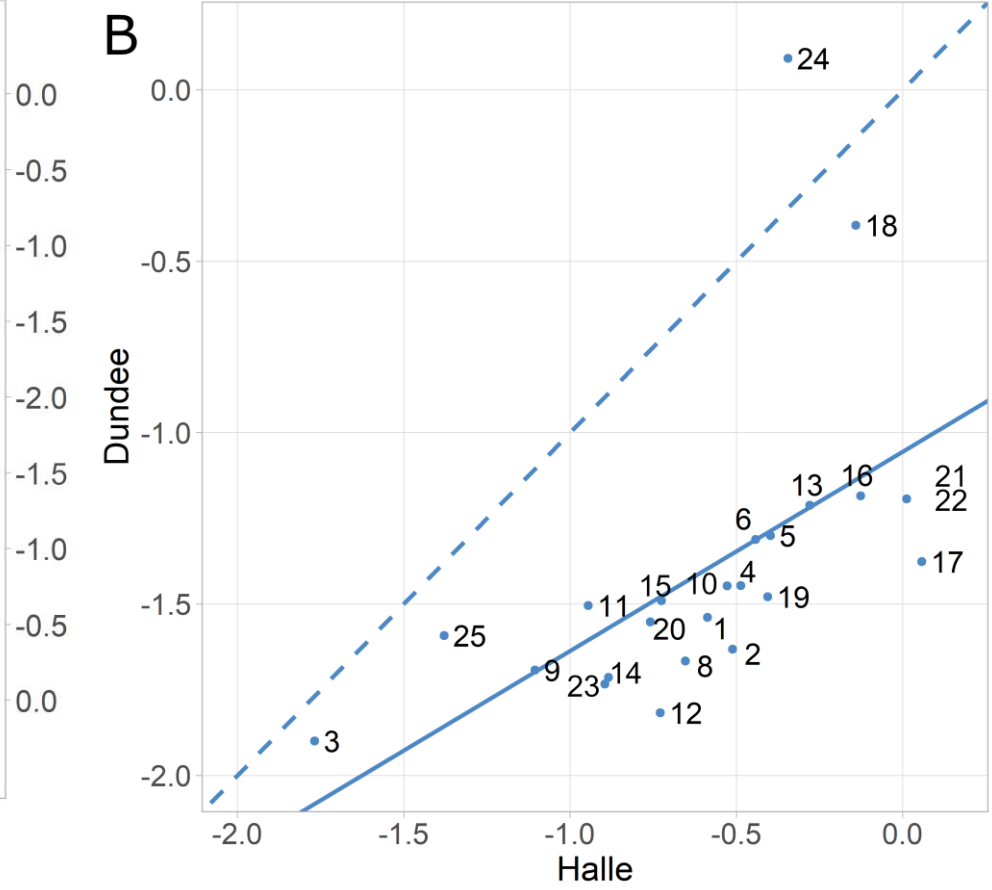

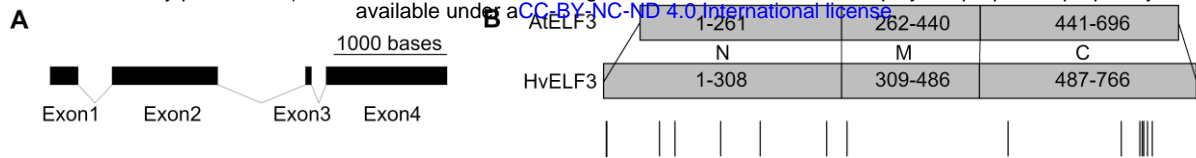

**C**

| Donor / Line <sup>a)</sup> | Haplo-types of HEB families | HEB family | Amino acid position <sup>b)</sup> |                 |    |     |     |     |     |     |   |     |     |     |     |     |     |     |
|----------------------------|-----------------------------|------------|-----------------------------------|-----------------|----|-----|-----|-----|-----|-----|---|-----|-----|-----|-----|-----|-----|-----|
|                            |                             |            | c)                                | N               |    |     |     |     |     |     | M | C   |     |     |     |     |     |     |
|                            |                             |            |                                   | 5 <sup>c)</sup> | 93 | 120 | 152 | 203 | 289 | 315 |   | 523 | 666 | 669 | 693 | 696 | 698 | 703 |
| Morex                      |                             |            |                                   | G               | P  | G   | N   | T   | Q   | G   | P | K   | G   | A   | A   | P   | S   | G   |
| BW290                      |                             |            |                                   | G               | P  | G   | N   | T   | *   |     |   |     |     |     |     |     |     |     |
| Bowman                     |                             |            |                                   | G               | P  | G   | N   | T   | Q   | G   | P | E   | G   | A   | A   | P   | S   | G   |
| HID_055                    | 1                           | 3          |                                   | G               | P  | G   | N   | T   | Q   | G   | P | E   | G   | A   | A   | P   | S   | W   |
| HID_386                    | 2                           | 25         |                                   | G               | P  | G   | N   | T   | Q   | G   | P | E   | G   | T   | A   | P   | S   | G   |
| HID_114                    | 3                           | 12         | G                                 | G               | P  | G   | N   | T   | Q   | G   | P | E   | G   | A   | A   | L   | S   | G   |
| HID_102                    | 4                           | 10         |                                   | G               | P  | G   | N   | T   | Q   | A   | P | E   | G   | A   | A   | L   | S   | G   |
| Barke                      | 5                           |            |                                   | G               | P  | G   | N   | T   | Q   | A   | P | E   | W   | A   | A   | L   | S   | G   |
| HID_080                    | 6                           | 7          |                                   |                 | P  | G   | N   | T   | Q   | G   | H | E   | G   | A   | V   | L   | S   | G   |
| HID_270                    | 7                           | 18         | G                                 | G               | P  | G   | D   | T   | Q   | G   | P | E   | G   | A   | A   | L   | S   | G   |
| HID_357                    | 8                           | 21         |                                   |                 | P  | G   | D   | T   | Q   | G   | P | E   | G   | A   | A   | L   | L   | G   |
| HID_219                    | 9                           | 16         |                                   | G               | S  | E   | N   | M   | Q   | G   | P | E   | G   | A   | A   | L   | S   | G   |
| HID_249                    | 9                           | 17         |                                   | G               | S  | E   | N   | M   | Q   | G   | P | E   | G   | A   | A   | L   | S   | G   |

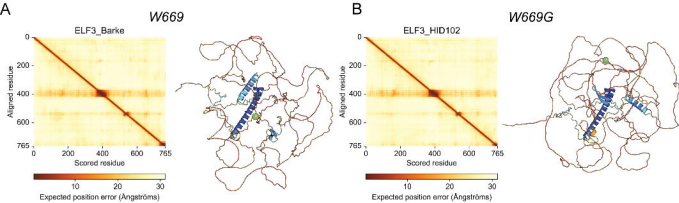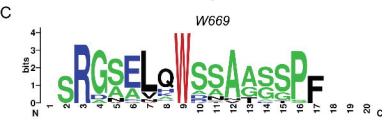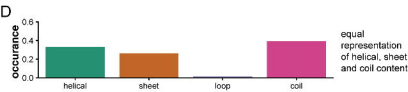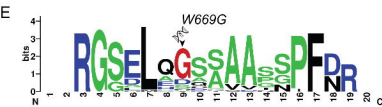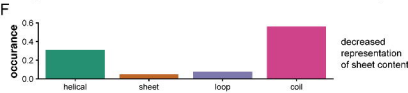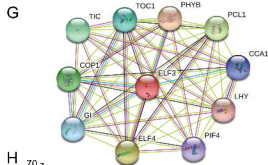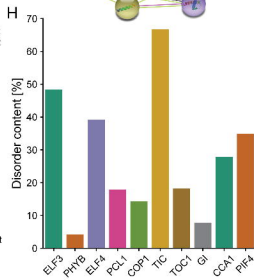

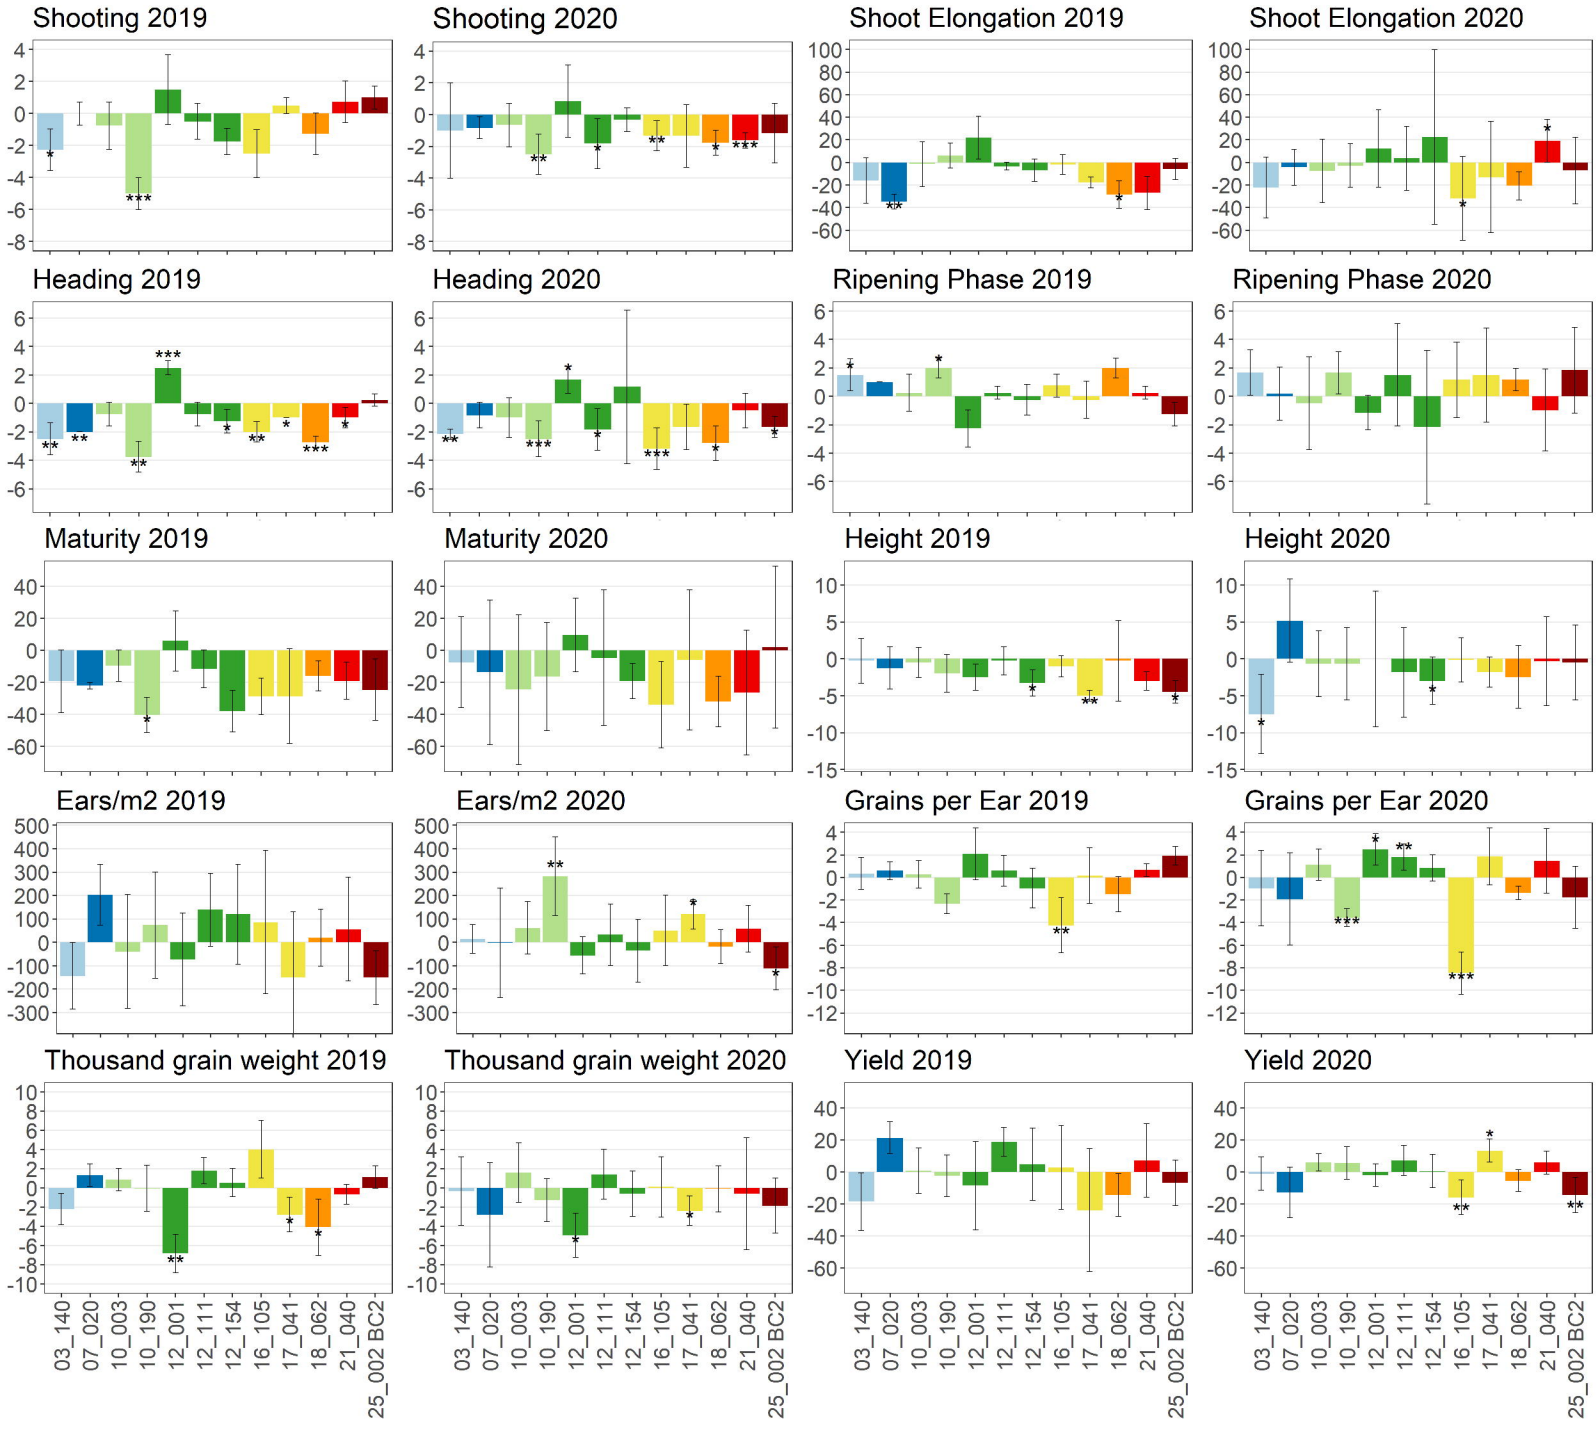

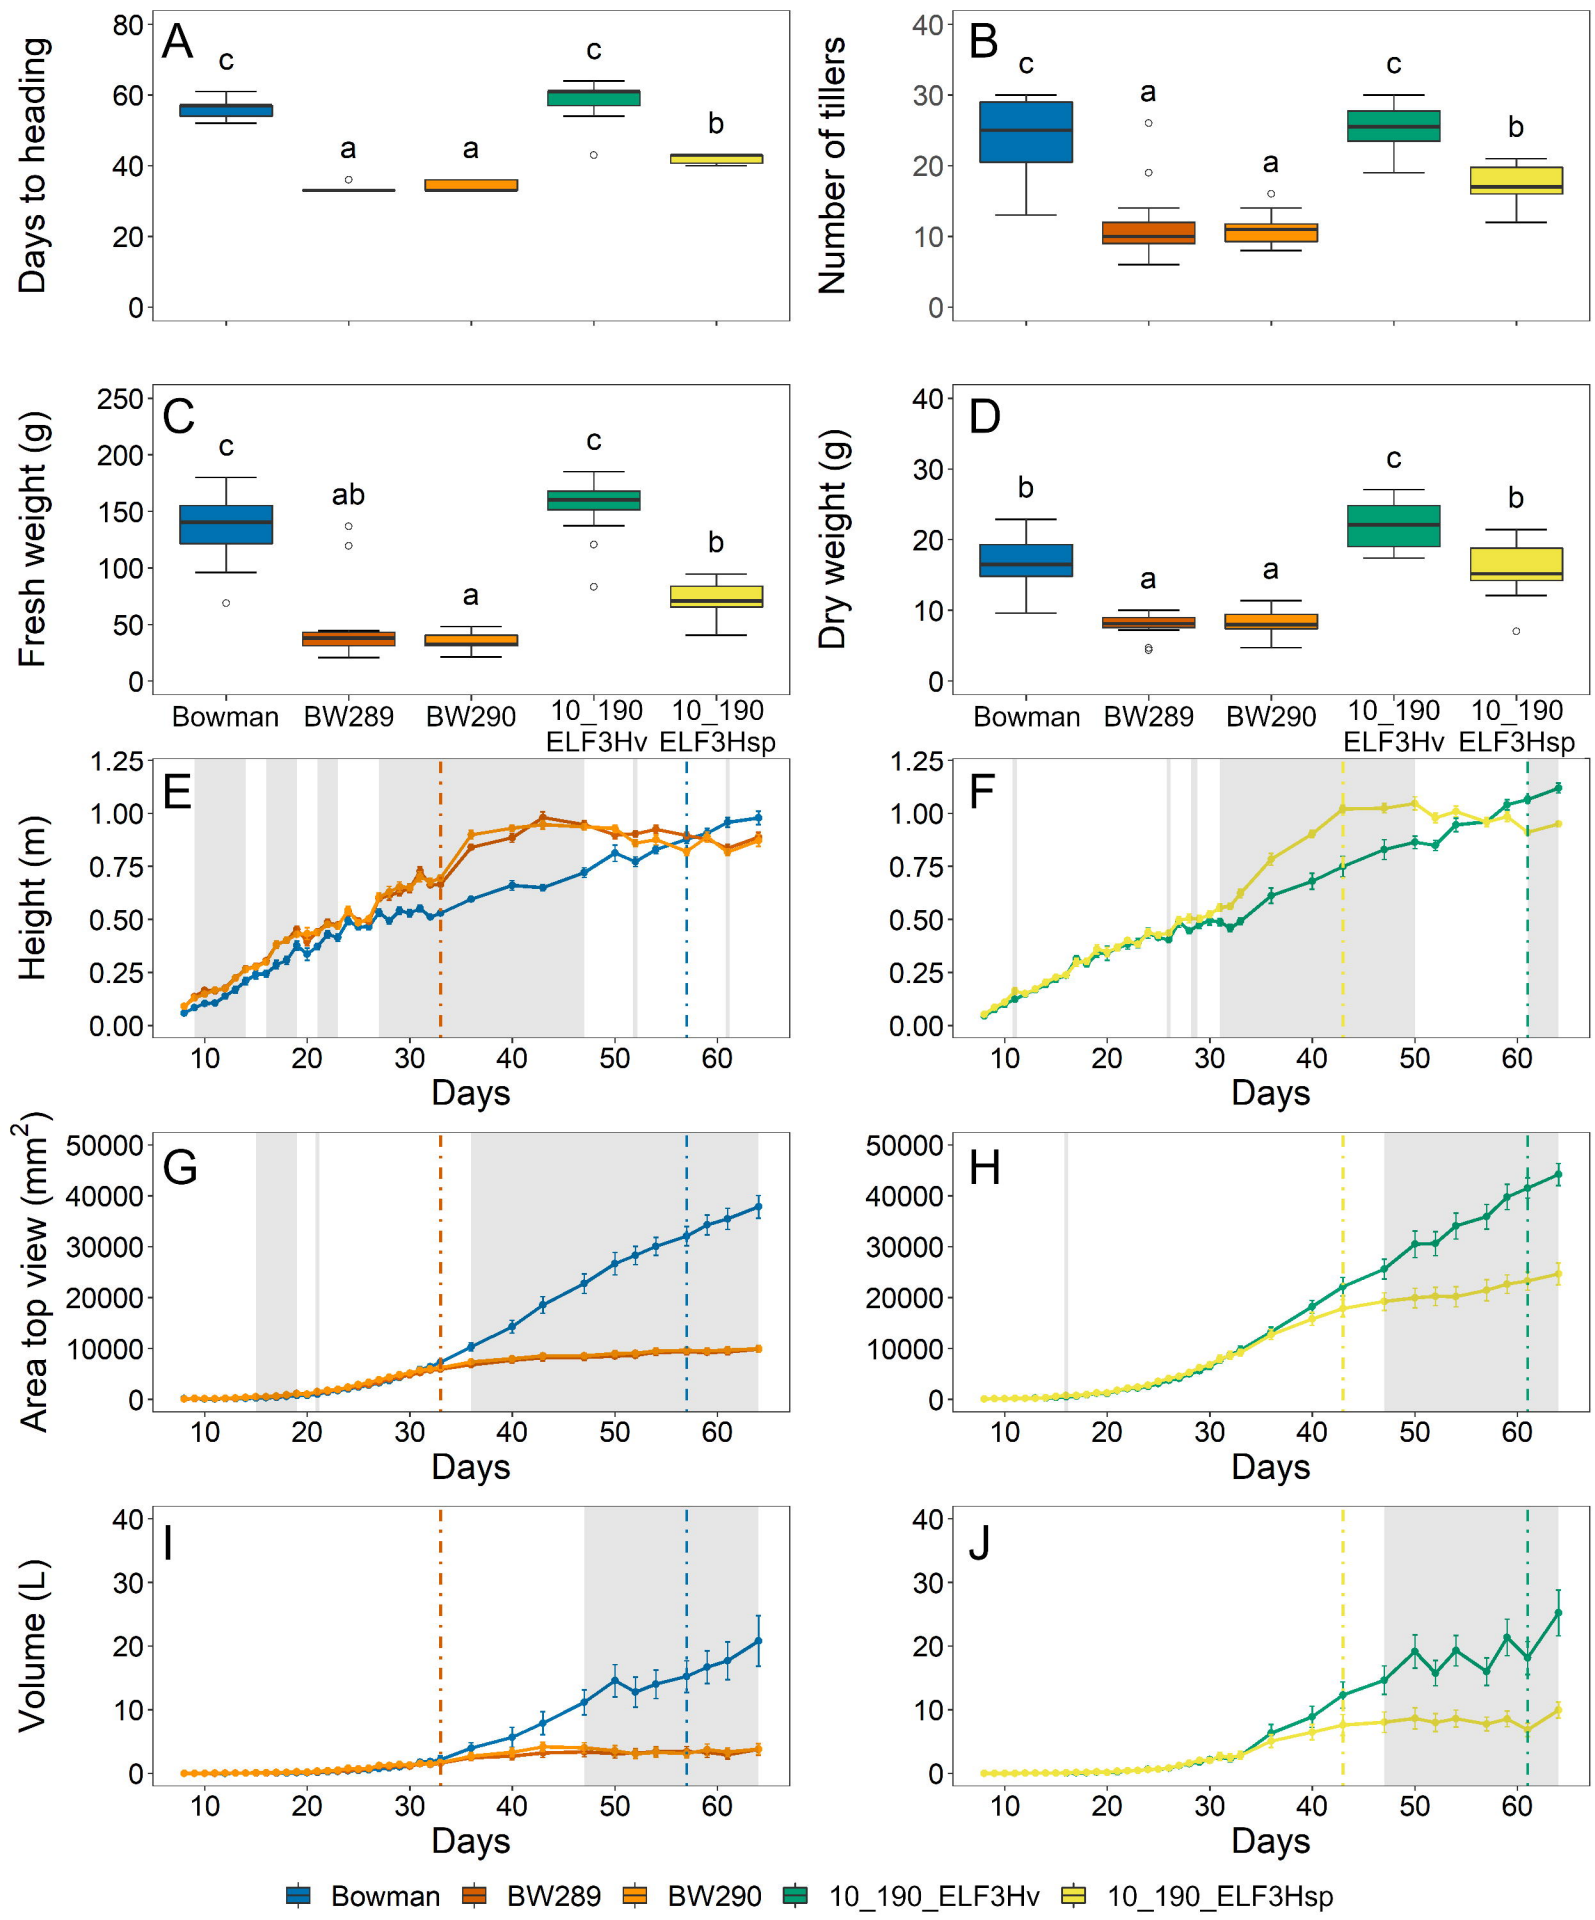

Source: https://www.biorxiv.org/content/10.1101/2022.07.15.500212v1.full.pdf
